# 1           **Optogenetic low-frequency stimulation of dentate granule cells** 2                           **prevents seizure generation in experimental epilepsy**

3 Paschen E<sup>1,2</sup>, Elgueta C<sup>3</sup>, Heining K<sup>2,4,5</sup>, Vieira DM<sup>4,5</sup>, Orcinha C<sup>1,2,5</sup>, Häussler U<sup>1,6</sup>,  
4 Bartos M<sup>3,6,7</sup>, Egert U<sup>4,5,6</sup>, Janz P<sup>\*1,2</sup>, Haas CA<sup>\*1,5,6,7</sup>

5  
6 \*These authors contributed equally to this work.

7  
8 1 Experimental Epilepsy Research, Department of Neurosurgery, Medical Center - University of  
9 Freiburg, Faculty of Medicine, Freiburg, Germany.

10 2 Faculty of Biology, University of Freiburg, Freiburg, Germany.

11 3 Systemic and Cellular Neurophysiology, Institute for Physiology I, Faculty of Medicine, University of  
12 Freiburg, Freiburg, Germany.

13 4 Biomicrotechnology, Department of Microsystems Engineering – IMTEK, Faculty of Engineering,  
14 University of Freiburg, Freiburg, Germany.

15 5 Bernstein Center Freiburg, University of Freiburg, Freiburg, Germany.

16 6 BrainLinks-BrainTools Cluster of Excellence, University of Freiburg, Freiburg, Germany.

17 7 Center for Basics in NeuroModulation, Faculty of Medicine, University of Freiburg, Freiburg, Germany

18  
19 Address of corresponding author:

20  
21 Prof. Dr. Carola A. Haas

22 Medical Center, University of Freiburg

23 Dept. of Neurosurgery, Exp. Epilepsy Research

24 Breisacherstr. 64

25 79106 Freiburg, Germany

26 **Email:** [carola.haas@uniklinik-freiburg.de](mailto:carola.haas@uniklinik-freiburg.de)

27  
28 **Keywords:** hippocampus, kainate, ictogenesis, optogenetic stimulation,  
29 channelrhodopsin

## 30 31 **Abstract**

32 Mesial temporal lobe epilepsy (MTLE) is the most common form of focal epilepsy in  
33 adults and is typically associated with hippocampal sclerosis and drug-resistant  
34 seizures. As an alternative to curative epilepsy surgery, brain stimulation evolves as a

35 promising approach for seizure-interference. However, particularly in MTLE with severe  
36 hippocampal sclerosis, current stimulation protocols are often not effective. Here, we  
37 show that optogenetic low-frequency stimulation (oLFS) of entorhinal afferents exhibits  
38 unprecedented anti-ictogenic effects in chronically epileptic mice. Photostimulation at 1  
39 Hz resulted in an almost complete suppression of focal seizures, independent of the  
40 degree of hippocampal sclerosis. Furthermore, by performing oLFS for 30 min before a  
41 pro-convulsive stimulus, seizure generalization was successfully prevented. Finally,  
42 acute slice experiments revealed a decreased excitability upon oLFS, which may  
43 partially explain the observed anti-epileptic effects. Taken together, our results suggest  
44 that oLFS of entorhinal afferents constitutes a promising approach for seizure control in  
45 MTLE.

46

## 47 **Introduction**

48 Mesial temporal lobe epilepsy (MTLE) represents the most common form of acquired  
49 epilepsy in adults and is thought to arise from pro-epileptic modifications of the mesio-  
50 limbic network (e.g., the hippocampus and entorhinal cortex) due to an initial  
51 precipitating insult (Engel, 2001), which could be a *status epilepticus* (SE), complex  
52 febrile seizures or trauma in early childhood. The most frequent histopathological  
53 hallmark of MTLE is hippocampal sclerosis, which is characterized by neuronal cell loss  
54 and reactive gliosis and is often associated with granule cell dispersion (GCD) and  
55 mossy fiber sprouting (Thom, 2014). MTLE is of particular clinical interest since it is  
56 often resistant to medication and surgical resection of the epileptic focus represents the  
57 only therapeutic option. However, many patients do not remain seizure-free following

58 curative epilepsy surgery (Mohan et al., 2018; Ryvlin & Kahane, 2005), thus  
59 demonstrating the urgent need for new therapeutic avenues.

60  
61 One alternative approach for treating patients with intractable epilepsy is electrical deep  
62 brain stimulation. Typically, high-frequency stimulation at 100-200 Hz is performed in the  
63 hippocampus or the anterior thalamic nucleus to interfere with limbic seizures (Li &  
64 Cook, 2018). However, in MTLE with severe hippocampal sclerosis, electrical stimulation  
65 appears remarkably ineffective most likely due to extensive neuronal cell loss and glial  
66 scarring (Velasco et al., 2007). To gain a mechanistic and circuit-based understanding of  
67 anti-ictogenic effects, electrical stimulation achieves high temporal and spatial control  
68 but lacks the necessary cell- or pathway-specificity. Optogenetic modulation of neuronal  
69 activity provides the required cell-specificity and has previously been applied to alleviate  
70 seizure activity in several animal studies (Esther Krook-Magnuson, Armstrong, Oijala, &  
71 Soltesz, 2013; Xu et al., 2016; Zhao, Alleva, Ma, Daniel, & Schwartz, 2015).

72  
73 The emergence of seizures is classically attributed to a shifted excitation/inhibition  
74 balance, hence the most common approaches for seizure intervention in the  
75 hippocampus so far are either based on inhibition of excitatory neurons or the  
76 recruitment of GABAergic interneurons (Kokaia, Andersson, & Ledri, 2013; E. Krook-  
77 Magnuson, Szabo, Armstrong, Oijala, & Soltesz, 2014; Ladas, Chiang, Gonzalez-Reyes,  
78 Nowak, & Durand, 2015; Ledri, Madsen, Nikitidou, Kirik, & Kokaia, 2014; Lu et al.,  
79 2016). The latter, however, resulted in an increased seizure probability during  
80 optogenetic stimulation (Lévesque et al., 2019). Other approaches investigated the  
81 effects of low-frequency stimulation (LFS) of entorhinal principal cells *in vitro* (Shiri et al.,

82 2017) and in a kindling model *in vivo* (Xu et al., 2016), demonstrating promising anti-  
83 ictogenic effects on evoked epileptic discharges. Nonetheless, it remains elusive  
84 whether LFS is effective in interfering with spontaneous, recurrent seizures in chronic  
85 MTLE. This question is of particular importance considering that pyramidal cells and  
86 GABAergic interneurons, putatively the main cellular substrate for effective LFS, are lost  
87 in the sclerotic hippocampus (Thom, 2014).

88  
89 In the present study, we addressed this question in mice that had received kainate (KA)  
90 into the right dorsal hippocampus to trigger SE and subsequent epileptogenesis.  
91 Importantly, this well-established MTLE mouse model recapitulates the major hallmarks  
92 of the human pathology, comprising the emergence of spontaneous recurrent seizures  
93 and robust unilateral hippocampal sclerosis (Bouilleret et al., 1999) with a sparing of  
94 dentate granule cells (DGCs) and CA2 pyramidal cells (Häussler, Rinas, Kiliyas, Egert, &  
95 Haas, 2016) as well as their entorhinal inputs (Janz et al., 2017a). In order to explore the  
96 anti-ictogenic effects of pathway-specific optogenetic low-frequency stimulation (oLFS)  
97 *in vivo*, we selectively photostimulated entorhinal afferents, which terminate on DGC  
98 dendrites in the lesioned hippocampus, during local field potential (LFP) recordings. We  
99 present evidence that oLFS is highly effective in preventing both subclinical and  
100 behavioral seizures in experimental MTLE with severe hippocampal sclerosis.

101

## 102 **Results**

### 103 **Variability of hippocampal sclerosis and seizure burden in chronically** 104 **epileptic mice**

105 First, we characterized the disease severity in mice injected with three different KA  
106 concentrations (10, 15 and 20 mM) by quantifying GCD, the extent of cell loss in CA1  
107 and hilus, and the seizure rate.

108 Quantitative analysis of GCD in NeuN-stained sections 35 to 40 days after KA  
109 injection revealed substantial differences between mice injected with low (10 mM) or  
110 high (20 and 15 mM) KA concentrations (Figure 2A). The volume of the dispersed GCL  
111 (i.e., the extent of GCD), was comparable between 20 and 15 mM KA but significantly  
112 less in the 10 mM KA group (Figure 2B, 10 mM:  $0.24 \pm 0.08 \text{ mm}^3$ ; 15 mM:  $1.56 \pm 0.16$   
113  $\text{mm}^3$ ; 20 mM:  $1.52 \pm 0.11 \text{ mm}^3$ , 10 mM vs 15 mM and vs 20 mM  $p < 0.001$ ;  $n = 4/6/5$   
114 animals). Conversely, the loss of CA1 pyramidal cells, determined as the total length of  
115 cell body-free CA1, was similar in all groups (Figure 2C, 10 mM:  $37.72 \pm 8.84 \text{ mm}$ ; 15  
116 mM:  $49.57 \pm 3.27 \text{ mm}$ ; 20 mM:  $42.28 \pm 6.44 \text{ mm}$ ;  $n = 4/6/5$  animals).

117 Comparing the density of hilar neurons in the sclerotic (ipsilateral) and the non-  
118 sclerotic (contralateral) hippocampus (Figure 2F, G), we found a significantly smaller  
119 loss of NeuN<sup>+</sup> neurons in the hilus at the KA injection site (idHC) of mice injected with 10  
120 mM KA (Figure 2D, 10 mM:  $52.78 \pm 7.24\%$  cell loss; 15 mM:  $86.47 \pm 3.90\%$  cell loss; 20  
121 mM:  $88.54 \pm 1.66\%$  cell loss; 10 mM vs 15 mM and vs 20 mM  $p < 0.001$ ;  $n = 4/6/5$   
122 animals), whereas *Gad67* mRNA<sup>+</sup> interneurons were equally lost in all groups (Figure  
123 2E, 10 mM:  $78.33 \pm 3.77\%$  cell loss; 15 mM:  $93.35 \pm 0.71\%$  cell loss; 20 mM:  $85.20 \pm$   
124  $4.35\%$  cell loss;  $n = 4/3/5$  animals). Animals with a greater loss of NeuN<sup>+</sup> neurons in the  
125 hilus also had a larger volume of the dispersed GCL (Figure 2H).

126 Next, we investigated the characteristics of epileptiform activity in chronically  
127 epileptic mice using LFP recordings at three positions in the ipsi- and contralateral  
128 hippocampus (idHC, ivHC and cdHC) (Figure 3). Interestingly, epileptic bursts occurred

129 in a region-specific manner depending on the KA concentration: A low KA concentration  
130 (10 mM), associated with mild hippocampal sclerosis, resulted in a spatially more  
131 restricted pattern of epileptic bursts compared to high concentrations (15 and 20 mM),  
132 associated with strong hippocampal sclerosis and more widespread bursts (Figure 3A,  
133 B, I). A detailed analysis of seizure classes (according to three categories ‘high-’,  
134 ‘medium-’ and ‘low-load’ bursts) demonstrated that 10 mM KA resulted in fewer high-  
135 load events compared to 15 or 20 mM KA (Figure 3C, D, individual values in Source  
136 Data Table 1). In addition, we found that the overall mean burst ratio and epileptic spike  
137 rate were smaller for the low KA concentration with mild sclerosis (Figure 3E, burst  
138 ratios: 10 mM:  $0.06 \pm 0.01$ ; 15 mM:  $0.20 \pm 0.03$ ; 20 mM:  $0.19 \pm 0.02$ , 10 mM vs 15 mM  
139 and vs 20 mM  $p < 0.01$ ; and Figure 3F, spike rates: 10 mM:  $0.32 \pm 0.02$ ; 15 mM:  $0.77 \pm$   
140  $0.11$ ; 20 mM:  $0.71 \pm 0.07$  Hz, 10 mM vs 15 mM  $p < 0.01$  and vs 20 mM  $p < 0.05$ ;  $n = 4/6/5$   
141 animals). Taken together, the extent of GCD and hilar cell loss was positively correlated  
142 with the spontaneous emergence of high-load events (Figure 3G,  $p < 0.001$ , Pearson’s  
143  $r = 0.92$ ; and Figure 3H,  $p < 0.05$ , Pearson’s  $r = 0.62$ ; both  $n = 15$  animals).

144 Our results show that the disease severity on both, the anatomical and  
145 electrophysiological level was modulated by the strength of the excitotoxic insult, thus  
146 providing a valuable framework for the robustness of our oLFS experiments.

147

### 148 **oLFS of granule cells prevents spontaneous recurrent seizures**

149 Since the sclerotic hippocampus is regarded as the epileptic focus (Esther Krook-  
150 Magnuson et al., 2015; Pallud et al., 2011), we decided to target surviving DGCs by  
151 photostimulation of afferent entorhinal fibers for seizure interference. To this end, adult  
152 mice received intrahippocampal KA and a ChR2-carrying viral construct into the medial

153 entorhinal cortex followed by LFP recordings and oLFS in the chronic epileptic phase  
154 (Figure 4A). Prior to photostimulation, baseline activity was recorded in ‘pre’ sessions for  
155 one hour to confirm the occurrence of recurrent seizures at the idHC position (Figure  
156 4B). We stimulated ChR2-expressing entorhinal fibers locally in the middle molecular  
157 layer of the sclerotic hippocampus (Figure 4C) with three frequencies (1, 0.5 and 0.2 Hz)  
158 in all epileptic animals that displayed different degrees of hippocampal sclerosis.

159 One hour of optogenetic stimulation with pulsed light at 1 Hz effectively  
160 suppressed the epileptiform activity (burst ratio) and reduced the epileptic spike rate in  
161 almost all animals independent of the KA concentration. When oLFS was stopped,  
162 epileptic activity returned to pre-stimulation levels within two hours (Figure 4D – F,  
163 individual values in Source Data Table 2). Photostimulation at both 0.5 and 0.2 Hz had  
164 also suppressive effects on epileptiform activity, but less pronounced than 1 Hz (Figure  
165 4G – L, values in Source Data Table 2). oLFS (1 Hz) did not influence epileptiform  
166 activity in no-virus control mice (Figure 4M – O, individual values in Source Data Table  
167 2).

168 To clarify whether the anti-epileptic effect was locally restricted to the stimulation  
169 site (idHC), we analyzed LFPs at the other two electrode positions (ivHC and cdHC).  
170 Interestingly, epileptiform activity was also suppressed at these sites (data not shown)  
171 indicating that oLFS in the sclerotic focus was highly effective in the whole  
172 hippocampus.

173 In parallel to LFP recordings and optogenetic stimulation, we assessed if the  
174 animals’ motor behavior in the open field was influenced by oLFS. We observed that  
175 mice showed frequent grooming and exploration during photostimulation. Video tracking  
176 revealed that all mice, independent of the KA concentration, exhibited normal running

177 behavior that declined gradually during the recording time of four hours (Supplementary  
178 Figure 2A – D, individual values in Source Data Table 3). Analysis of all ‘pre’ and ‘oLFS’  
179 sessions showed a stable pattern over the six days of stimulation (Supplementary Figure  
180 2E, F), indicating that hippocampal oLFS did not impair open-field behavior of  
181 chronically epileptic mice.

182 Taken together, oLFS of entorhinal afferents at 1 Hz was most effective compared  
183 to lower frequencies in preventing the emergence of spontaneous recurrent seizures  
184 during stimulation independently of the disease severity.

185

## 186 **Analysis of evoked responses to oLFS**

187 Since oLFS was not equally effective in suppressing epileptiform activity in all sessions  
188 (see Figure 4), we analyzed the strength of the evoked responses to photostimulation by  
189 determining the median AUC in each session for all frequencies and electrode positions  
190 (see Methods).

191 Linear regression analysis revealed a positive relationship between the median  
192 evoked response and the stimulation efficacy (quotient of the burst ratio of ‘oLFS’ and  
193 ‘pre’ sub-sessions) especially for 1 and 0.5 Hz (Supplementary Figure 3A – C) indicating  
194 that a strong cellular response is necessary for successful seizure suppression. This  
195 observation was most pronounced in the sclerotic focus where we applied  
196 photostimulation. When we compared the efficacy of stimulation across frequencies, we  
197 considered only sessions with a cellular response within the range of the standard  
198 deviation of the mean. Thus, oLFS at 1 Hz resulted in a remarkable reduction (90%) of  
199 the burst ratio, whereas 0.5 Hz and 0.2 Hz were less efficient (80% and 40% reduction),  
200 but nevertheless showed anti-epileptic effects (Supplementary Figure 3D, 1 Hz: 92.17%;



201 0.5 Hz: 78.93%; 0.2 Hz: 39.42%, 95% CI [80.49, 97.86], [44.32, 100.00], and [18.11,  
202 50.42], respectively, 0.2 Hz vs 1 Hz  $p < 0.001$  and vs 0.5 Hz  $p < 0.05$ ;  $n = 29/18/17$   
203 sessions; 15/12/12 animals).

204 Next, we tested whether the neuronal response to oLFS was confined to the  
205 stimulated area. To this end, we analyzed the spatial and temporal occurrence of evoked  
206 responses at all three recording sites. In all animals, light-pulses delivered to the idHC  
207 did not only trigger local but also delayed responses in both hippocampi (Supplementary  
208 Figure 4). Population spikes occurred first at the stimulation site in the sclerotic region  
209 followed by the ipsilateral ventral and the contralateral dorsal position. These latencies  
210 remained stable over the stimulation period of one hour (Supplementary Figure 4D,  
211 idHC to ivHC:  $3.96 \pm 0.30$  ms; idHC to cdHC:  $8.99 \pm 0.59$  ms,  $n = 13/8$  sessions),  
212 suggesting that photostimulation of entorhinal fibers may lead to action potential  
213 generation in a subset of DGCs and subsequent propagation within the hippocampal  
214 network.

215 To infer if anti-ictogenic effects by oLFS are due to activation of DGCs or are  
216 specific for the stimulation of entorhinal afferents, we performed direct photostimulation  
217 of ChR2-expressing DGCs (Figure 5A, B). Similar to stimulation of entorhinal afferents, 1  
218 Hz oLFS of DGCs achieved substantial seizure control (reduction of burst ratio and  
219 epileptic spike rate) with no apparent rebound effect after the oLFS offset (Figure 5C –  
220 E, individual values in Source Data Table 4,  $n = 3$  animals). However, in contrast to  
221 perforant path oLFS, the reappearance of high-load bursts was evident within minutes  
222 after direct photostimulation of DGCs (Figure 5F, 1 Hz perforant path oLFS:  $35.20 \pm 7.14$   
223 min; 1 Hz DGC oLFS:  $7.93 \pm 2.84$  min,  $p < 0.001$ ;  $n = 18/7$  sessions; 11/3 animals).

224 In conclusion, both, direct oLFS of DGCs and indirect oLFS via entorhinal  
225 afferents had seizure suppressive effects, with the latter showing a longer-lasting anti-  
226 epileptic effect of around 30 min.

227

### 228 **oLFS interferes with seizure generalization**

229 Since spontaneous recurrent seizures are mainly subclinical in the intrahippocampal KA  
230 mouse model and seizure generalization is rare, we aimed at inducing generalized  
231 seizures by photostimulation (Janz et al., 2018; Osawa, Iwasaki, Hosaka, Matsuzaka, &  
232 Tomita, 2013). Initial experiments with 10 Hz for 10 s showed that during the first few  
233 seconds of stimulation, only evoked potentials followed each light pulse. High-amplitude  
234 epileptic spikes emerged in addition to the evoked potentials during further stimulation  
235 and gradually became rhythmic and dominant, progressing into a fully-blown behavioral  
236 seizure (Supplementary Figure 5A). On the electrophysiological level, these seizures  
237 displayed electrographic features highly similar to those of spontaneous generalized  
238 seizures (Supplementary Figure 5B) and were also accompanied by the same  
239 stereotypic myoclonic movements (e.g., rearing, falling and convulsion).

240 First, we determined the minimum stimulus duration sufficient to reliably trigger a  
241 generalized seizure but avoiding that the pro-convulsive 10 Hz stimulus masks the anti-  
242 ictogenic effect of oLFS (Figure 6A). Interestingly, in mice with lower KA concentrations  
243 generalized seizures were induced much faster, suggesting a higher susceptibility for  
244 seizure generalization (Figure 6B, 10 mM:  $5.75 \pm 0.63$  s; 15 mM:  $7.83 \pm 0.87$  s; 20 mM:  
245  $13.67 \pm 1.86$  s, 10 and 15 mM vs 20 mM  $p < 0.01$ ;  $n = 3/6/4$  animals). With the progression  
246 of seizure activity, mice exhibited behavioral symptoms equivalent to RS stages 1 to 5  
247 independent of the stimulation duration (Figure 6C,  $n = 3/6/4$  animals).

248           Next, we probed the competence of oLFS to interfere with generalized seizures.  
249   When we started 1 Hz oLFS directly after the pro-convulsive 10 Hz stimulus, we could  
250   not interrupt ongoing seizures (Figure 6D). In contrast, pre-conditioning with oLFS for 30  
251   minutes applied prior to the pro-convulsive stimulus at either 1 or 0.5 Hz very effectively  
252   lowered the probability for seizure generalization (Figure 6E, F, I, without (w/o) pre-  
253   oLFS:  $96.79 \pm 2.20\%$ ; with 1 Hz pre-oLFS:  $15.60 \pm 7.75\%$ ,  $p < 0.01$ ;  $n = 7$ ; w/o pre-oLFS:  
254    $97.73 \pm 2.27\%$ ; with 0.5 Hz pre-oLFS:  $12.12 \pm 8.13\%$ ,  $p < 0.05$ ;  $n = 14/11$  animals). Those  
255   trials in which seizure generalization was not prevented completely, the ensuing seizure  
256   was associated with a milder behavioral phenotype (Figure 6G, w/o oLFS: RS  $2.58 \pm$   
257    $0.31$ ; with 1 Hz oLFS: RS  $0.29 \pm 0.17$ ; Figure 6J, w/o oLFS: RS  $2.88 \pm 0.32$ ; with 0.5 Hz  
258   oLFS: RS  $0.37 \pm 0.25$ ,  $p < 0.001$ ;  $n = 13/10$  animals).

259           In conclusion, oLFS of entorhinal afferents not only prevents subclinical,  
260   spontaneous recurrent seizures but also interferes with the generation of evoked  
261   generalized seizures.

262

### 263   **Effects of oLFS on the cellular response**

264   In order to understand the underlying mechanisms of the anti-ictogenic effects of oLFS,  
265   we investigated the evoked responses in DGCs by quantifying the AUC of each  
266   individual evoked response over the one hour stimulation period. For this analysis, we  
267   chose only sessions, which were within the 95% CI regarding the respective stimulation  
268   efficacy, as reported above (Supplementary Figure 3D).

269           Both, indirect, via entorhinal afferents, or direct oLFS of DGCs, evoked stable  
270   responses with respect to temporal occurrence and waveforms (Figure 7). Responses  
271   evoked by direct photostimulation of DGCs decreased slightly over time (Figure 7A1-3,

272 B), whereas stimulation of entorhinal afferents caused a more pronounced and rapid  
273 (within 10 min) decrease of the cellular response (Figure 7C1-3, D) suggesting that a  
274 synaptic mechanism contributes to the longer-lasting anti-ictogenic effect of entorhinal  
275 afferent-mediated oLFS. Lower frequencies (0.5 and 0.2 Hz) altered the cellular  
276 response much less (Figure 7E – H). Similarly, pre-conditioning with 1 or 0.5 Hz reduced  
277 the evoked response (AUC) of the pro-convulsive 10 Hz pulse-train by about 40%  
278 (Figure 6H, w/o oLFS:  $890.9 \pm 113.4$ ; with 1 Hz oLFS:  $508.6 \pm 68.57$ ,  $p < 0.01$ ; Figure 6K,  
279 w/o oLFS:  $977.6 \pm 125.4$ ; with 0.5 Hz oLFS:  $638.8 \pm 86.05$ ,  $p < 0.05$ ,  $n = 12/10$  animals).

280 To elaborate whether oLFS decreases the excitability of DGCs, we studied their  
281 intrinsic properties and the synaptic strength of entorhinal inputs in acute slices from  
282 chronically epileptic mice. Whole-cell recordings were obtained from DGCs located in  
283 the outer region of the dispersed GCL. Cells were filled with biocytin during recordings  
284 for subsequent morphological identification (Figure 8A,  $n = 11$  animals). Photostimulation  
285 of afferent entorhinal fibers (473 nm; 50 ms pulse duration) induced robust  
286 depolarization ( $5.1 \pm 1$  mV,  $n = 14$  cells) and was occasionally sufficient to induce action  
287 potentials (-70 mV holding potential,  $n = 4$  cells). During oLFS (10 min, 1 Hz) evoked  
288 synaptic responses were strongly depressed (Figure 8B, reduction of EPSP amplitude to  
289  $28.5 \pm 9.9\%$  of the original response,  $n = 14$  cells), suggesting synaptic fatigue. To test  
290 this possibility, we evaluated the effect of oLFS on discharge probability upon electrical  
291 stimulation of entorhinal fibers. To maintain intracellular conditions in DGCs, we used  
292 cell-attached recordings. Action potentials were reliably evoked in DGCs by five  
293 electrical stimulation pulses at 50 Hz. Photostimulation for 10 min, however, clearly  
294 reduced discharge probability (Figure 8C, discharge probability at 100 V stimulation,  
295 control:  $35.4 \pm 6.0\%$  vs. after oLFS:  $21.2 \pm 5.2\%$ ,  $p < 0.001$ ,  $n = 19$  cells). In contrast,

296 intrinsic properties of DGCs were not altered by the applied stimulation protocol (control:  
297 resting membrane potential ( $V_m$ ) =  $-73.4 \pm 1.1$  mV;  $C_m$  =  $53.5 \pm 3.7$  pF;  $R_m$  =  $298.7 \pm$   
298  $27.4$  M $\Omega$ ; Rheobase =  $150.8 \pm 14.1$  pA; n=27 cells; after oLFS:  $V_m$  =  $-74.8 \pm 1.3$  mV;  $C_m$   
299 =  $56.4 \pm 7.5$  pF;  $R_m$  =  $313.9 \pm 36.8$  M $\Omega$ ; Rheobase =  $153.3 \pm 26.4$  pA; n=14 cells)  
300 suggesting that the reduced excitability of DGCs during oLFS may be explained by a  
301 reduced glutamate release from entorhinal projections.

302

## 303 **Discussion**

304 In the present study, we applied oLFS of entorhinal afferents to the epileptic  
305 hippocampus in experimental MTLE to interfere with ictogenesis *in vivo*. In particular,  
306 1 Hz stimulation demonstrated remarkable anti-ictogenic effects which were  
307 independent of the individual degree of hippocampal sclerosis and seizure severity.  
308 Reaching out towards an understanding of the underlying mechanism, our findings  
309 suggest that oLFS in the epileptic focus lowers seizure susceptibility most likely by  
310 synaptic fatigue rather than by decreasing the intrinsic excitability of DGCs.

311

312 To date, electrical high-frequency stimulation (HFS, 130-200 Hz and 1-5 V) of the  
313 hippocampus has been used empirically in clinical settings as an approach to control  
314 intractable mesiotemporal seizures. It is widely assumed that electrical pulses applied at  
315 high frequencies reduce the seizure threshold by disrupting network synchronization,  
316 while low frequencies are believed to elicit the opposite effect. So far, only a few studies  
317 applied LFS in human MTLE (Lim et al., 2016), whereas HFS has been performed  
318 extensively with variable success (Fisher & Velasco, 2014; Li & Cook, 2018): Half of all  
319 patients from clinical studies experienced a 48–95% seizure reduction; however, in

320 randomized controlled trials the overall efficacy reached only 26–40% following HFS (Li  
321 & Cook, 2018). This variability can be partially explained by sub-optimal electrode  
322 positioning, different follow-up durations and preselection criteria. Importantly, the extent  
323 of hippocampal sclerosis appeared to be a critical parameter for stimulation efficacy  
324 (Boëx et al., 2011; Lim et al., 2016; Velasco et al., 2007). This is in line with the  
325 hypothesis that neuronal loss and/or altered electrical resistance in sclerotic neural  
326 tissue hinder HFS, since stimulation can only be successful when targeting a sufficiently  
327 preserved network. Therefore, patients with hippocampal sclerosis may require specific  
328 stimulation parameters to achieve seizure control. In fact, a small cohort study (Lim et  
329 al., 2016) showed that LFS at 5 Hz was effective in two patients with hippocampal  
330 sclerosis pointing to the use of LFS in a clinical setting. However, to systematically  
331 assess anti-ictogenic effects of LFS in relation to disease parameters, studies in  
332 translational animal models are crucial.

333  
334 Accordingly, we used the intrahippocampal KA mouse model of MTLE that recapitulates  
335 the major pathological hallmarks of the human disease, comprising unilateral  
336 hippocampal sclerosis and the emergence of spontaneous recurrent seizures (Bouilleret  
337 et al., 1999; Janz et al., 2017b). An important aspect of our study was to create an  
338 animal model that reflects the inter-individual variability of neurodegeneration and  
339 seizure frequency as observed in human MTLE (Blümcke et al., 1999; Thom, 2014). In  
340 fact, we found experimental conditions that resulted in varying degrees of  
341 histopathological changes and of epileptiform activity, depending on the KA  
342 concentration. In particular, cell death of hilar neurons and the extent of GCD increased  
343 with the KA dose, whereas DGCs survived. This is in line with previous reports from

344 both, human patients and mouse epilepsy models, showing that DGCs are highly  
345 resistant to overexcitation and are the surviving neuronal sup-type under sclerotic  
346 conditions (Thom, 2014; Young et al., 2009). Therefore, we chose DGCs as targets and  
347 photostimulated entorhinal fibers which synapse onto DGCs dendrites, thus stimulating  
348 DGCs indirectly. In fact, oLFS of entorhinal afferents at 1 Hz effectively abolished  
349 spontaneous recurrent seizures in animals with both mild and severe hippocampal  
350 sclerosis. Also lower stimulation frequencies (0.5 and 0.2 Hz) showed reasonable anti-  
351 epileptic effects. In addition, this protocol appeared to generate action potentials in  
352 DGCs, since evoked populations spikes were not only evident at the site of light delivery,  
353 but also with a polysynaptic delay in the other ipsilateral and contralateral recording  
354 sites, showing that the neuronal network necessary for propagation was maintained.  
355 Accordingly, local oLFS effectively suppressed seizure activity in both hippocampi.

356  
357 Although the mechanism underlying the anti-epileptic effect of oLFS is not clear, several  
358 lines of evidence suggest that LFS, either electrically or optogenetically, reduces the  
359 excitability of the hippocampus and associated networks (i.e., the entorhinal cortex). *In*  
360 *vitro* data indicate that electrical stimulation of the subiculum or entorhinal cortex at 1 Hz  
361 suppresses ictal activity induced by 4-AP (Shiri et al., 2017). Similarly, 1 Hz  
362 photostimulation of CaMKIIa-positive principal cells in the entorhinal cortex reduces the  
363 frequency and duration of ictal discharges (Shiri et al., 2017). Also, 1 Hz electrical or  
364 optogenetic stimulation of the entorhinal cortex *in vivo* successfully reduces the severity  
365 of seizure-like after-discharges upon hippocampal kindling in mice (Xu et al., 2016).  
366 Similar results were obtained by direct electrical LFS in the ventral hippocampal fissure  
367 in both, a genetic and a kindling epilepsy model (Kile, Tian, & Durand, 2010; Rashid,

368 Pho, Czigler, Werz, & Durand, 2012). Although these studies provide valuable insight  
369 into the seizure-suppressing effects of LFS, it was unclear whether LFS is capable of  
370 preventing ictogenesis in chronic MTLE with hippocampal sclerosis. In this context, our  
371 study reveals an unprecedented efficacy of 1 Hz stimulation directly in the highly-  
372 sclerotic hippocampus to interfere with the generation of both, spontaneous subclinical  
373 recurrent seizures and evoked generalized seizures. In contrast to Xu et al. (2016) (Xu  
374 et al., 2016), our results suggest that the anti-ictogenic effect does not depend on the  
375 local recruitment of GABAergic interneurons since this cell population is extensively  
376 diminished in our model (Marx, Haas, & Häussler, 2013). This is an important  
377 observation because the loss of GABAergic interneurons is also a common finding in  
378 human MTLE with hippocampal sclerosis (Young et al., 2009). Therefore, targeting  
379 GABAergic interneurons is not feasible in these cases. The majority of current  
380 optogenetic approaches for seizure control in experimental epilepsy rely on decreasing  
381 network activity, either by direct inhibition of DGCs or by activating GABAergic  
382 interneurons (Kokaia et al., 2013; Esther Krook-Magnuson et al., 2013; Ladas et al.,  
383 2015; Ledri et al., 2014), whereas our approach aims at low-frequency activation of  
384 'epileptic' DGCs by local stimulation of entorhinal afferents. Considering the clinical  
385 limitations of optogenetics, our approach could nevertheless be translated into the  
386 clinics, as from an anatomical perspective, selective stimulation of entorhinal afferents in  
387 humans can be achieved by electrode placement in the clearly-defined angular bundle  
388 (Zeineh et al., 2017). Therefore, indirect stimulation via entorhinal afferents represents a  
389 highly promising strategy that may overcome limited stimulation efficacy associated with  
390 hippocampal sclerosis.

391



392 Mechanistically, it is rather astonishing that synchronization of the hippocampal network  
393 by oLFS via entorhinal afferents interferes with ictogenesis. A hypothesis put forward by  
394 Avoli et al. (2013) (Avoli, de Curtis, & Köhling, 2013) implies that more frequent  
395 activation (i.e. at 0.5 Hz vs. 0.1 Hz) of the network results in less accumulation of  
396 extracellular potassium compared to large potassium efflux associated with GABA<sub>A</sub>  
397 receptor-mediated interictal discharges that could trigger a seizure. Clamping GABA-  
398 mediated potentials with 1 Hz LFS (directly via activation of GABAergic interneurons or  
399 indirectly via feedback inhibition upon principal cell activity) could therefore restrain pro-  
400 ictogenic discharges (Shiri et al., 2017). Our results show that this intriguing mechanism  
401 cannot fully account for the anti-ictogenic effect of oLFS, since in whole-cell recordings,  
402 we observed a decrease in the amplitude of evoked responses in the presence of  
403 GABA<sub>A</sub> and GABA<sub>B</sub> receptor blockers. Another explanation, supported by our data,  
404 relies on synaptic depression (both, synaptic fatigue and long-term depression (LTD))  
405 that is induced at the entorhinal–DGC synapse with stimulation frequencies equal or  
406 below 1 Hz (Abrahamsson, Gustafsson, & Hanse, 2005; Gonzalez, Morales, Villarreal, &  
407 Derrick, 2014). Accordingly, we show that the amplitude of evoked responses is  
408 decreased over time on both, the network and the single-cell level, which could explain  
409 the delayed onset of spontaneous seizures following oLFS. Although not tested in the  
410 present study, we propose that our oLFS paradigm leads to hetero- rather than  
411 homosynaptic depression, since it is unlikely that downscaling of entorhinal inputs only is  
412 sufficient to suppress seizure activity given that performant path transection does not  
413 alleviate seizures (Meyer, Kienzler-Norwood, Bauer, Rosenow, & Norwood, 2016). Yet,  
414 synaptic depression may only account for the prolonged anti-ictogenic effects observed  
415 upon oLFS of entorhinal afferents, in which the gradual decrease of evoked potentials

416 was much more prominent compared to direct oLFS of DGCs, although, both protocols  
417 showed remarkable performance in acute seizure suppression. Therefore, with respect  
418 to acute anti-ictogenic effects, we suggest that oLFS drives the hippocampal network  
419 into a “stable state”, reducing the probability of seizures while LFS is ongoing. This  
420 notion is supported by Chang et al., (2018) (Chang et al., 2018) who showed that  
421 evoked interictal-like discharges elicit anti-ictogenic effects that depend on both, the  
422 network state and stimulus properties, including amplitude and frequency. This study  
423 investigated the influence of interictal discharges on ictogenesis *in vitro* in local CA3 and  
424 CA1 circuits, two subnetworks that are typically lost in MTLE with hippocampal sclerosis.  
425 Our results strongly suggest that the authors’ observations also apply to the entorhinal-  
426 dentate network *in vivo*. In line with this interpretation, oLFS of entorhinal afferents may  
427 introduce glutamatergic synaptic perturbation, which is followed by transient suppression  
428 of neuronal activity (M. De Curtis, Librizzi, & Biella, 2001; Marco De Curtis & Avanzini,  
429 2001; Muldoon et al., 2015) and interference with the slow process of critical slowing  
430 before seizure onset (Chang et al., 2018).

431  
432 In conclusion, our study has identified 1 Hz oLFS of entorhinal afferents as a highly  
433 efficient approach to interfere with ictogenesis in MTLE with hippocampal sclerosis. We  
434 show that the effect is largely driven by repetitive activation of DGCs residing in the  
435 seizure focus, and we have shed light on the associated cellular mechanisms.  
436 Considering the potential for clinical translation, our findings may pave the way for  
437 effective seizure control in one of the most common forms of drug-resistant epilepsy.

438

439

## 440 **Materials and Methods**

### 441 **Animals**

442 Experiments were conducted with adult (8–12 weeks) transgenic male mice  
443 (C57BL/6-Tg(Thy1-eGFP)-M-Line) (Feng et al., 2000). Each animal represents an  
444 individual experiment, performed once. A total of 53 mice were used for this study. Mice  
445 were kept in a 12 h light/dark cycle at room temperature (RT) with food and water *ad*  
446 *libitum*. All animal procedures were carried out in accordance with the guidelines of the  
447 European Community's Council Directive of 22 September 2010 (2010/63/EU) and were  
448 approved by the regional council (Regierungspräsidium Freiburg).

449

### 450 **KA and virus injections**

451 Mice were injected with KA into the right dorsal hippocampus (n=33 for in vivo oLFS  
452 experiments and n=20 for acute slice electrophysiology), as described previously  
453 (Heinrich et al., 2006; Häussler et al., 2012; Janz et al., 2017a). Accordingly, mice were  
454 deeply anesthetized (ketamine hydrochloride 100 mg/kg, xylazine 5 mg/kg, atropine 0.1  
455 mg/kg body weight, i.p.) followed by stereotaxic injection of 50 nL of either 10, 15 or 20  
456 mM KA solution (Tocris, Bristol, UK) in 0.9% sterile saline. Mice were randomly assigned  
457 to the respective kainate concentration group. Stereotaxic coordinates relative to  
458 bregma were: anteroposterior (AP) = -2.0 mm, mediolateral (ML) = -1.5 mm, and  
459 relative to the cortical surface: dorsoventral (DV) = -1.5 mm. Following KA injection the  
460 occurrence of a behavioral SE was verified, characterized by mild convulsion, chewing,  
461 immobility or rotations, as described before (Riban et al., 2002; Tulke, Haas, & Häussler,

462 2019). Mice which did not experience a SE (n=4) or did not survive KA treatment (n=6)  
463 were excluded from further experiments.

464 For optogenetic stimulation of entorhinal fibers, KA-treated animals were  
465 stereotaxically injected with a recombinant adeno-associated virus (AAV, 0.45  $\mu$ l; n=22  
466 for in vivo oLFS experiments and n=17 for acute slice electrophysiology), carrying the  
467 genomic sequences for channelrhodopsin 2 (ChR2) fused to mCherry under the control  
468 of the  $Ca^{2+}$ /calmodulin-dependent kinase II alpha (CaMKIIa) promoter  
469 (AAV1.CaMKIIa.hChR2(H134R)-mCherry.WPRE.hGH; Penn Vector Core, Pennsylvania,  
470 USA) into the medial entorhinal cortex in the same surgery (Janz et al., 2018).  
471 Stereotaxic coordinates relative to bregma: AP = -5.0 mm, ML = -2.9 mm, and relative to  
472 the cortical surface: DV = -1.8 mm. KA-injected mice without virus injection were used  
473 as controls (no-virus controls, n=3). In a subset of animals, the viral vector (0.35  $\mu$ l) was  
474 injected at the same location as KA to enable direct DGC stimulation (n=6).

475

## 476 **Implantations**

477 Teflon-coated platinum-iridium wires (125  $\mu$ m diameter; World Precision Instruments,  
478 Sarasota, Florida, USA) were implanted at three positions into the hippocampal  
479 formation in KA/virus-injected mice at 16 to 19 days after SE as described previously  
480 (Janz et al., 2018): ipsilateral dorsal (idHC), ipsilateral ventral (ivHC) and contralateral  
481 dorsal (cdHC). All animals were additionally implanted with an optic fiber (ferrule 1.25  
482 mm, cannula 200  $\mu$ m diameters; Prizmatix Ltd., Givat-Shmuel, Israel) at the same  
483 position as the idHC electrode, but at a 30° angle. Stereotaxic coordinates were chosen  
484 relative to bregma (AP, ML) or to the cortical surface (DV): cdHC: AP = -2.0 mm, ML =  
485 +1.4 mm, DV = -1.6 mm; idHC: AP = -2.0 mm, ML = -1.4 mm (-2.4 mm for the optic

486 fiber), DV = -1.6 mm; and ivHC: AP = -3.4 mm, ML = -2.8 mm, DV = -2.1 mm. The  
487 correct positions of electrodes and optic fibers were confirmed by histology  
488 (Supplementary Figure 1). Two stainless steel screws (DIN 84; Schrauben-Jäger,  
489 Landsberg, GER) were implanted above the frontal cortex to provide a reference and  
490 ground, respectively. Electrodes and screws were soldered to a micro-connector (BLR1-  
491 type). The implant was fixed with dental cement (Paladur).

492

### 493 **In vivo oLFS experiments**

494 After recovery from implantations, freely-behaving mice were first recorded on two  
495 successive days (three hours each) to determine reference LFPs (Figure 1). Each  
496 mouse represents the biological and the number of recordings per mouse the technical  
497 replicate. To this end, mice were connected to a miniature preamplifier (MPA8i, Smart  
498 Ephys/ Multi Channel Systems, Reutlingen, GER). Signals were amplified 1000-fold,  
499 bandpass-filtered from 1 Hz to 5 kHz and digitized with a sampling rate of 10 kHz  
500 (Power1401 analog-to-digital converter, Spike2 software, Cambridge Electronic Design,  
501 Cambridge, UK). On days 19 to 25 post-injection, photostimulation with pulsed blue light  
502 (460 nm; 50 ms pulse duration; 150 mW/mm<sup>2</sup> at the fiber tip; blue LED, Prizmatix Ltd.)  
503 was applied at low frequencies (1, 0.5 or 0.2 Hz) to test the effect of oLFS on  
504 spontaneously occurring seizures. During stimulation, we continuously recorded LFPs  
505 and videos. Recording sessions were divided into four sub-sessions: 'pre' - one hour  
506 before oLFS; 'oLFS' - one hour during oLFS; 'post 1' and 'post 2' - first hour and second  
507 hour after oLFS (Figure 1). For each frequency, we performed two trials on different  
508 days. For no-virus controls, only the 'pre' and 'oLFS' (1 Hz) sessions were done to check  
509 for light- or heat-induced effects.

510           Because in the intrahippocampal mouse model spontaneous recurrent seizures  
511 are frequent but mainly subclinical, whereas spontaneous behavioral seizures are rare,  
512 we additionally evoked these by 10 Hz photostimulation (25 ms pulse duration) (Figure  
513 1) and assessed the effect of oLFS before or after the pro-convulsive 10 Hz stimulus.  
514 First, we systematically increased the stimulation duration (in 1-s steps) to determine the  
515 minimum duration sufficient to trigger a behavioral seizure for each animal (identification  
516 of seizure threshold). Each evoked seizure was manually inspected on the  
517 electrophysiological as well as behavioral level: we identified generic features as  
518 described by Jirsa et al. (2014) (Jirsa, Stacey, Quilichini, Ivanov, & Bernard, 2014) and  
519 motor symptoms according to the Racine scale (RS) (Racine, 1972). The identified  
520 seizure threshold was then validated for robust seizure induction for at least three times.  
521 In subsequent “preconditioning” oLFS sessions, photostimulation at 1 or 0.5 Hz was  
522 performed for 30 min before applying the pro-convulsive 10 Hz stimulus. For both  
523 frequencies, a minimum of three trials was performed on different days. In a subset of  
524 mice, ictogenic efficacy of the 10 Hz stimulus was tested again after the preconditioning  
525 experiments to exclude confounding effects of habituation.

526

## 527 **Perfusion and tissue preparation**

528 Following the last recording session, mice were anesthetized (see above) 35 - 40 days  
529 after KA injection and transcardially perfused [0.9% saline followed by 4%  
530 paraformaldehyde in 0.1 M phosphate buffer (PB, pH 7.4)]. Following dissection, brains  
531 were post-fixated overnight, immersed in sucrose (25% in PB) overnight at 4°C for cryo-  
532 protection, shock-frozen in isopentane at -40°C and stored at -80°C. Brains were  
533 sectioned (coronal plane, 50 µm) with a cryostat (CM3050, Leica, Bensheim, GER).

534 Slices were collected in 2x saline-sodium citrate buffer (2xSSC; 0.3 M NaCl, 0.03 M  
535 sodium citrate, pH 7.0).

536

### 537 **Fluorescent in situ hybridization**

538 *Glutamic acid decarboxylase 67 (Gad67)* mRNA was localized by FISH with digoxigenin  
539 (DIG)-labeled cRNA probes generated by *in vitro* transcription as described earlier (Kulik  
540 et al., 2003). Slices were hybridized with DIG-labeled antisense cRNA probes (see  
541 Supplementary material), and immunodetection of the DIG-labeled hybrids was  
542 performed with a peroxidase-conjugated anti-DIG antibody (1:2000; raised in sheep;  
543 Roche Diagnostics, Mannheim, GER). The fluorescence signal was developed with  
544 tyramide signal amplification (TSA) Plus Cyanine 3 System kit (PerkinElmer, Waltham,  
545 Massachusetts, USA) as described previously (Tulke et al., 2019).

546

### 547 **Immunohistochemistry**

548 For immunofluorescence staining, free-floating sections were pre-treated in 10% normal  
549 horse serum (Vectorlabs, Burlingame, California, USA) in PB for one hour.  
550 Subsequently, slices were incubated first with guinea-pig anti-NeuN (1:500; Synaptic  
551 Systems, Göttingen, GER) overnight at 4 °C and then with a donkey anti-guinea-pig  
552 Cy5-conjugated antibody for 2.5 hours at RT (1:200, Jackson ImmunoResearch  
553 Laboratories Inc., West Grove, Pennsylvania, USA) followed by extensive rinsing in PB.  
554 Sections were mounted on glass slides with antifading mounting medium (DAKO,  
555 Hamburg, Germany).

556

### 557 **Image acquisition and analysis**

558 Fluorescence composite images were taken with an Axiomager2 microscope using  
559 Plan-APOCHROMAT 5x or 10x objectives (Zeiss, Göttingen, GER). Exposure times (5x  
560 objective: Cy5-labeled NeuN, 500 ms; 10x objective: Cy3-labeled *Gad67* probe, 700 ms,  
561 Cy5-labeled NeuN, 5 s) were kept constant for each staining. The images were further  
562 processed with ZEN blue software (Zeiss).

563 To assess the extent of hippocampal sclerosis we quantified the volume of the dispersed  
564 granule cell layer (GCL) and cell loss in the hilus and CA1 along the septo-temporal axis  
565 of the hippocampus using Fiji ImageJ software (Schindelin et al., 2012). Here, masking  
566 was performed, since the evaluator was not aware of the respective kainate treatment.  
567 In detail, a region-of-interest (ROI) was drawn visually comprising the dispersed parts of  
568 the GCL using the ImageJ “polygon” function in each slice (around 50 per animal).  
569 Afterwards, the volume was calculated based on the area measured in each slice  
570 (values are given in mm<sup>3</sup>). For quantification of cell loss, the summed length of  
571 pyramidal cell-free gaps in the CA1 region was measured in each section using the  
572 “segmented line” function. Furthermore, hilar cell loss was quantified by automated  
573 detection (Cell Counter plugin) of NeuN<sup>+</sup> cells (size parameter: 50-infinity pixel<sup>2</sup>) and  
574 *Gad67* mRNA<sup>+</sup> interneurons (size parameter: 100-infinity pixel<sup>2</sup>) in the hilus of three  
575 dorsal sections for each animal. Here, we calculated the percentage of cell loss in the  
576 sclerotic hippocampus compared to the contralateral, non-sclerotic hippocampus (set to  
577 100%). In detail, the Cy3 and Cy5 channels were split and individual images were  
578 converted to gray-scale. Images were background-subtracted by manual adjustment of  
579 the threshold and further processed using the “watershed” function, which separates  
580 overlapping cell bodies. A ROI was then defined for the hilus with the “polygon” function,  
581 and the respective cell density was calculated.



582

### 583 **Analysis of epileptiform activity**

584 Recordings obtained from all electrodes were visually inspected for epileptiform activity.

585 Animals that showed abnormal hippocampal atrophy were excluded from the analysis

586 (n=1 for entorhinal fiber stimulation, n=3 for DGC stimulation). LFP data from the idHC

587 site was then analyzed in detail using a custom algorithm (Heining et al., 2019). In the

588 intrahippocampal KA mouse model, spontaneous recurrent seizures are evident as

589 frequent bursts of high-amplitude sharp waves without behavioral symptoms (Riban et

590 al., 2002). These bursts were classified according to their spike-load, hence, three

591 categories of discharge patterns were identified (high-load, medium-load, and low-load

592 bursts) as described by Heining et al. (2019) (Heining et al., 2019). To assess the

593 severity of epileptiform activity within a recording, we calculated a ‘burst ratio’ as the

594 quotient of the high-load burst duration and the total recording duration. The automatic

595 detection of high-load bursts was verified by visual inspection. To assess epileptic

596 burden of individual mice, the average burst ratio was calculated from a total of nine LFP

597 recordings (15 hours) performed on different days (2x three hours before oLFS

598 experiments, 6x one hour of ‘pre’ sessions of oLFS experiments and 1x three hours after

599 oLFS experiments; Figure 1). In oLFS experiments, anti-epileptic effects were evaluated

600 based on the burst ratio and the epileptic spike rate calculated for the respective

601 sub-session (‘pre’, ‘oLFS’, ‘post 1’, post 2’). Individual trials in which a ‘pre’ recording

602 had a burst ratio below 0.05 were excluded. Furthermore, we analyzed the magnitude of

603 evoked responses during photostimulation using a 4<sup>th</sup> order low pass Chebyshev filter

604 with a cut-off frequency of 300 Hz to calculate the area under the curve (AUC, source

605 code available). The time windows for the calculation of AUCs were set for each light

606 pulse from -0.1 s to +0.2 s for oLFS (1, 0.5 and 0.2 Hz) and from -0.02 s to +0.06 s for  
607 the 10 Hz stimulation. To allow comparisons across animals, LFP data was z-scored and  
608 responses during high-load bursts were excluded from the calculation of the median  
609 AUC and polynomial fit. Recordings obtained from ivHC and cdHC sites were used to  
610 analyze the region-specific occurrence of epileptiform activity and to measure pulse  
611 latencies between recording sites during photostimulation sessions.

612

### 613 **Acute slice electrophysiology**

614 In an additional set of experiments, mice were deeply anesthetized 21 to 28 days after  
615 KA (15 mM) and virus injection, perfused with 10 ml cold protective solution containing  
616 (in mM): 92 choline chloride, 30 NaHCO<sub>3</sub>, 2.5 KCl, 1.2 NaH<sub>2</sub>PO<sub>4</sub>, 25 D-glucose, 20  
617 HEPES, 0.5 CaCl<sub>2</sub>, 5 Na-ascorbate acid, 2 Thiourea, 3 Na-Pyruvate, 10 MgCl<sub>2</sub> and 12  
618 N-acetylcysteine (oxygenated with 95% O<sub>2</sub> / 5% CO<sub>2</sub>, 34°C) before dissection.  
619 Transverse acute hippocampal slices (300-350 μm) were obtained and incubated for 1 h  
620 at 34°C in a solution in which choline was replaced by 1 N-Methyl-D-glucamine (NMDG).  
621 Afterwards, slices were stored in artificial cerebrospinal fluid (ACSF, containing in mM:  
622 125 NaCl, 25 NaHCO<sub>3</sub>, 2.5 KCl, 1.25 NaH<sub>2</sub>PO<sub>4</sub>, 25 D-glucose, 2 CaCl<sub>2</sub> and 1 MgCl<sub>2</sub>  
623 oxygenated with 95% O<sub>2</sub> / 5% CO<sub>2</sub>) and supplemented with 12 mM N-acetylcysteine at  
624 RT. Whole-cell patch-clamp recordings were performed as previously described  
625 (Elgueta, Köhler, & Bartos, 2015) in the presence of GABA<sub>A</sub> and GABA<sub>B</sub> receptor  
626 blockers (10 μM gabazine and 2 μM CGP55845, respectively; 30-34°C; Multiclamp 700B  
627 amplifier (Molecular Devices, San José, California, USA); 5 kHz low-pass filter; sampling  
628 frequency 40 kHz). Stimulus generation, data acquisition and analysis were performed  
629 using custom-made programs written in Igor (WaveMetrics Inc., Portland, Oregon, USA).

630 Recording pipettes were filled with a solution containing (in mM): 140 K-Gluconate, 4  
631 KCl, 10 HEPES, 2 MgCl<sub>2</sub>, 2 Na<sub>2</sub>ATP, 10 EGTA, 0.125 Alexa-Fluor 488 and 0.15 %  
632 biocytin (pH = 7.2; 290-310 mOsm), that resulted in pipette resistances of 4-6 MΩ.  
633 Series resistances between (8 – 20 MΩ) were compensated using bridge balance in  
634 current-clamp and were left uncompensated in voltage-clamp. For loose-patch  
635 experiments and extracellular stimulations, pipettes were filled with a HEPES-buffered  
636 ACSF (containing in mM: ACSF (see above), 135 NaCl, 5.4 KCl, 1.8 CaCl<sub>2</sub>, 1 MgCl<sub>2</sub>, 5  
637 HEPES). Extracellular stimulation was performed using a stimulus isolator (Isopulser)  
638 with pipettes (~1 MΩ) placed in the middle molecular layer where the virus was  
639 expressed. Five pulses (50 Hz, 0.1–0.3 ms, 20–100 V) were evoked and a minimum of  
640 ten trials was used to calculate the overall discharge probability. The rheobase was  
641 measured with 1 s-long current injections increasing with 20 pA steps. Series resistance,  
642 cell capacitance (C<sub>m</sub>) and membrane resistance (R<sub>m</sub>) were calculated from -10 mV  
643 pulses. 10 min photostimulation was performed using full-field blue light pulses (473 nm;  
644 50 ms pulse duration; LED p2000, CoolLED, Andover, UK).

645

## 646 **Statistical analysis**

647 Data were tested for significant differences with Prism 7 software (GraphPad Software  
648 Inc.). Comparisons of two groups were performed with a paired (comparisons within  
649 animals) or unpaired (comparisons between animals) Student's t-test. Multiple-group  
650 comparisons were calculated with an ordinary or repeated measure (RM) one-way  
651 ANOVA followed by a Tukey's *post hoc* test. Significance thresholds were set to:  
652 \**p*<0.05, \*\**p*<0.01 and \*\*\**p*<0.001. For all values, mean and standard error of the mean

653 (SEM) are given, unless otherwise reported. Correlations were tested using Pearson's  
654 correlation (slope significantly non-zero, confidence interval (CI) 95 %).

655

## 656 **Data availability statement**

657 The LFP dataset has been made available <https://osf.io/uk94m/>. The source code and  
658 user information for the seizure detection algorithm can be obtained from Ulrich Egert  
659 upon request. Contact: [egert@imtek.uni-freiburg.de](mailto:egert@imtek.uni-freiburg.de)

660

## 661 **Acknowledgements**

662 We thank Piret Kleis and Lea Hüper for support with data analysis and Andrea Djie-  
663 Maletz for excellent technical assistance. We thank Dr. Antje Kiliyas for critical  
664 discussions and valuable input.

665

## 666 **Author contributions**

667 EP, Data curation, Formal analysis, Investigation, Visualization, Methodology, Writing—  
668 original draft preparation, Writing—review and editing; CE, Data curation, Formal  
669 analysis, Investigation, Visualization, Methodology, Writing—original draft preparation,  
670 Writing—review and editing; KH, Formal analysis, Software, Investigation, Visualization,  
671 Writing—review and editing; DV, Formal analysis, Investigation, Visualization, Writing—  
672 review and editing; CO, Data curation; UH, Validation, Methodology, Writing—review and  
673 editing; MB, Funding acquisition; UE, Funding acquisition, Methodology, Writing—review  
674 and editing; PJ, Conceptualization, Supervision, Validation, Data curation, Formal

675 analysis, Investigation, Methodology, Writing—review and editing; CAH,  
676 Conceptualization, Supervision, Funding acquisition, Writing—review and editing

677

## 678 **Funding**

679 This work was supported by the German Research Foundation as part of the Cluster of  
680 Excellence “BrainLinks-BrainTools” within the framework of the German Excellence  
681 Initiative (grant number EXC 1086) and the German Research Foundation grant HA  
682 1443/11-1.

683

## 684 **Competing interests**

685 The authors report no competing interests.

686

## 687 **References**

688 Abrahamsson, T., Gustafsson, B., & Hanse, E. (2005). Synaptic fatigue at the naive  
689 perforant path-dentate granule cell synapse in the rat. *J Physiol*, *569*(3), 737–750.

690 <https://doi.org/10.1113/jphysiol.2005.097725>

691 Avoli, M., de Curtis, M., & Köhling, R. (2013). Does interictal synchronization influence  
692 ictogenesis? *Neuropharmacology*, *69*, 37–44.

693 <https://doi.org/10.1016/j.neuropharm.2012.06.044.Does>

694 Blümcke, I., Züschratter, W., Schewe, J. C., Suter, B., Lie, A. A., Riederer, B. M., ...

695 Wiestler, O. D. (1999). Cellular pathology of hilar neurons in Ammon’s horn

696 sclerosis. *J Comp Neurol*, *414*(4), 437–453. [https://doi.org/10.1002/\(SICI\)1096-](https://doi.org/10.1002/(SICI)1096-)

697 [9861\(19991129\)414:4<437::AID-CNE2>3.0.CO;2-3](https://doi.org/10.1002/(SICI)1096-9861(19991129)414:4<437::AID-CNE2>3.0.CO;2-3)

- 698 Boëx, C., Seeck, M., Vulliémoz, S., Rossetti, A. O., Staedler, C., Spinelli, L., ... Pollo, C.  
699 (2011). Chronic deep brain stimulation in mesial temporal lobe epilepsy. *Seizure*,  
700 20(6), 485–490. <https://doi.org/10.1016/j.seizure.2011.03.001>
- 701 Bouilleret, V., Ridoux, V., Depaulis, A., Marescaux, C., Nehlig, A., & Le Gal La Salle, G.  
702 (1999). Recurrent seizures and hippocampal sclerosis following intrahippocampal  
703 kainate injection in adult mice: Electroencephalography, histopathology and  
704 synaptic reorganization similar to mesial temporal lobe epilepsy. *Neuroscience*,  
705 89(3), 717–729. [https://doi.org/10.1016/S0306-4522\(98\)00401-1](https://doi.org/10.1016/S0306-4522(98)00401-1)
- 706 Chang, W. C., Kudlacek, J., Hlinka, J., Chvojka, J., Hadrava, M., Kumpost, V., ...  
707 Jiruska, P. (2018). Loss of neuronal network resilience precedes seizures and  
708 determines the ictogenic nature of interictal synaptic perturbations. *Nat Neurosci*,  
709 21(12), 1742–1752. <https://doi.org/10.1038/s41593-018-0278-y>
- 710 De Curtis, M., & Avanzini, G. (2001). Interictal spikes in focal epileptogenesis. *Prog*  
711 *Neurobiol*, 63(5), 541–567. [https://doi.org/10.1016/S0301-0082\(00\)00026-5](https://doi.org/10.1016/S0301-0082(00)00026-5)
- 712 De Curtis, M., Librizzi, L., & Biella, G. (2001). Discharge threshold is enhanced for  
713 several seconds after a single interictal spike in a model of focal epileptogenesis.  
714 *Eur J Neurosci*, 14(1), 174–178. <https://doi.org/10.1046/j.0953-816X.2001.01637.x>
- 715 Elgueta, C., Köhler, J., & Bartos, M. (2015). Persistent discharges in dentate gyrus  
716 perisoma-inhibiting interneurons require hyperpolarization-activated cyclic  
717 nucleotide-gated channel activation. *J Neurosci*, 35(10), 4131–4139.  
718 <https://doi.org/10.1523/JNEUROSCI.3671-14.2015>
- 719 Engel, J. (2001). Mesial temporal lobe epilepsy: What have we learned? *The*  
720 *Neuroscientist*, 7(4), 340–352. <https://doi.org/10.1177/107385840100700410>
- 721 Feng, G., Mellor, R. H., Bernstein, M., Keller-Peck, C., Nguyen, Q. T., Wallace, M., ...

- 722 Sanes, J. R. (2000). Imaging neuronal subsets in transgenic mice expressing  
723 multiple spectral variants of GFP. *Neuron*, 28(1), 41–51.  
724 [https://doi.org/10.1016/S0896-6273\(00\)00084-2](https://doi.org/10.1016/S0896-6273(00)00084-2)
- 725 Fisher, R. S., & Velasco, A. L. (2014). Electrical brain stimulation for epilepsy. *Nat Rev*  
726 *Neurol*, 10(5), 261–270. <https://doi.org/10.1038/nrneurol.2014.59>
- 727 Gonzalez, J., Morales, I. S., Villarreal, D. M., & Derrick, B. E. (2014). Low-frequency  
728 stimulation induces long-term depression and slow onset long-term potentiation at  
729 perforant path-dentate gyrus synapses in vivo. *J Neurophys*, 111(6), 1259–1273.  
730 <https://doi.org/10.1152/jn.00941.2012>
- 731 Häussler, U., Bielefeld, L., Friepp, U. P., Wolfart, J., & Haas, C. A. (2012).  
732 Septotemporal position in the hippocampal formation determines epileptic and  
733 neurogenic activity in temporal lobe epilepsy. *Cereb Cortex*, 22(1), 26–36.  
734 <https://doi.org/10.1093/cercor/bhr054>
- 735 Häussler, U., Rinas, K., Kiliyas, A., Egert, U., & Haas, C. A. (2016). Mossy fiber sprouting  
736 and pyramidal cell dispersion in the hippocampal CA2 region in a mouse model of  
737 temporal lobe epilepsy. *Hippocampus*, 26(5), 577–588.  
738 <https://doi.org/10.1002/hipo.22543>
- 739 Heining, K., Kiliyas, A., Janz, P., Häussler, U., Kumar, A., Haas, C. A., & Egert, U. (2019).  
740 Bursts with high and low load of epileptiform spikes show context-dependent  
741 correlations in epileptic mice. *ENeuro*, 6(5), 1–14.  
742 <https://doi.org/10.1523/ENEURO.0299-18.2019>
- 743 Heinrich, C., Nitta, N., Flubacher, A., Mueller, M., Fahrner, A., Kirsch, M., ... Haas, C. A.  
744 (2006). Reelin deficiency and displacement of mature neurons, but not  
745 neurogenesis, underlie the formation of granule cell dispersion in the epileptic

- 746 hippocampus. *J Neurosci*, 26(17), 4701–4713.
- 747 <https://doi.org/10.1523/JNEUROSCI.5516-05.2006>
- 748 Janz, P., Hauser, P., Heining, K., Nestel, S., Kirsch, M., Egert, U., & Haas, C. A. (2018).
- 749 Position- and time-dependent Arc expression links neuronal activity to synaptic
- 750 plasticity during epileptogenesis. *Front Cell Neurosci*, 12(8), 1–18.
- 751 <https://doi.org/10.3389/fncel.2018.00244>
- 752 Janz, P., Savanthrapadian, S., Häussler, U., Kiliyas, A., Nestel, S., Kretz, O., ... Haas, C.
- 753 A. (2017). Synaptic remodeling of entorhinal input contributes to an aberrant
- 754 hippocampal network in temporal lobe epilepsy. *Cereb Cortex*, 27(3), 2348–2364.
- 755 <https://doi.org/10.1093/cercor/bhw093>
- 756 Janz, P., Schwaderlapp, N., Heining, K., Häussler, U., Korvink, J. G., von Elverfeldt, D.,
- 757 ... Haas, C. A. (2017). Early tissue damage and microstructural reorganization
- 758 predict disease severity in experimental epilepsy. *ELife*, 6, e25742.
- 759 <https://doi.org/10.7554/eLife.25742>
- 760 Jirsa, V. K., Stacey, W. C., Quilichini, P. P., Ivanov, A. I., & Bernard, C. (2014). On the
- 761 nature of seizure dynamics. *Brain*, 137(8), 2210–2230.
- 762 <https://doi.org/10.1093/brain/awu133>
- 763 Kile, K. B., Tian, N., & Durand, D. M. (2010). Low frequency stimulation decreases
- 764 seizure activity in a mutation model of epilepsy. *Epilepsia*, 51(9), 1745–1753.
- 765 <https://doi.org/10.1111/j.1528-1167.2010.02679.x>.Low
- 766 Kokaia, M., Andersson, M., & Ledri, M. (2013). An optogenetic approach in epilepsy.
- 767 *Neuropharmacology*, 69, 89–95. <https://doi.org/10.1016/j.neuropharm.2012.05.049>
- 768 Krook-Magnuson, E., Armstrong, C., Bui, A., Lew, S., Oijala, M., & Soltesz, I. (2015). In
- 769 vivo evaluation of the dentate gate theory in epilepsy. *J Physiol*, 593(10), 2379–88.



- 770 <https://doi.org/10.1113/JP270056>
- 771 Krook-Magnuson, E., Armstrong, C., Oijala, M., & Soltesz, I. (2013). On-demand  
772 optogenetic control of spontaneous seizures in temporal lobe epilepsy. *Nat*  
773 *Commun*, 4, 1376. <https://doi.org/10.1038/ncomms2376>
- 774 Krook-Magnuson, E., Szabo, G. G., Armstrong, C., Oijala, M., & Soltesz, I. (2014).  
775 Cerebellar directed optogenetic intervention inhibits spontaneous hippocampal  
776 seizures in a mouse model of temporal lobe epilepsy. *ENeuro*, 1(1), 1–15.  
777 <https://doi.org/10.1523/ENEURO.0005-14.2014>
- 778 Kulik, Á., Vida, I., Luján, R., Haas, C. A., López-Bendito, G., Shigemoto, R., & Frotscher,  
779 M. (2003). Subcellular localization of metabotropic GABA(B) receptor subunits  
780 GABA(B1a/b) and GABA(B2) in the rat hippocampus. *J Neurosci*, 23(35), 11026–  
781 11035. <https://doi.org/10.1523/jneurosci.23-35-11026.2003>
- 782 Ladas, T. P., Chiang, C.-C., Gonzalez-Reyes, L. E., Nowak, T., & Durand, D. M. (2015).  
783 Seizure reduction through interneuron-mediated entrainment using low frequency  
784 optical stimulation. *Exp Neurol*, 2(74), 120–132.  
785 <https://doi.org/10.1126/scisignal.274pe36>.Insulin
- 786 Ledri, M., Madsen, M. G., Nikitidou, L., Kirik, D., & Kokaia, M. (2014). Global optogenetic  
787 activation of inhibitory interneurons during epileptiform activity. *J Neurosci*, 34(9),  
788 3364–3377. <https://doi.org/10.1523/JNEUROSCI.2734-13.2014>
- 789 Lévesque, M., Chen, L., Etter, G., Shiri, Z., Wang, S., Williams, S., & Avoli, M. (2019).  
790 Paradoxical effects of optogenetic stimulation in mesial temporal lobe epilepsy. *Ann*  
791 *Neurol*, 86(5), 714–728. <https://doi.org/10.1002/ana.25572>
- 792 Li, M. C. H., & Cook, M. J. (2018). Deep brain stimulation for drug-resistant epilepsy.  
793 *Epilepsia*, 59(2), 273–290. <https://doi.org/10.1111/epi.13964>

- 794 Lim, S.-N., Lee, C.-Y., Lee, S.-T., Tu, P.-H., Chang, B.-L., Lee, C.-H., ... Wu, T. (2016).  
795 Low and high frequency hippocampal stimulation for drug-resistant mesial temporal  
796 lobe epilepsy. *Neuromodulation*, *19*(4), 365–372. <https://doi.org/10.1111/ner.12435>
- 797 Lu, Y., Zhong, C., Wang, L., Wei, P., He, W., Huang, K., ... Wang, L. (2016). Optogenetic  
798 dissection of ictal propagation in the hippocampal-entorhinal cortex structures. *Nat*  
799 *Commun*, *7*, 10962. <https://doi.org/10.1038/ncomms10962>
- 800 Marx, M., Haas, C. A., & Häussler, U. (2013). Differential vulnerability of interneurons in  
801 the epileptic hippocampus. *Front Cell Neurosci*, *7*, 167.  
802 <https://doi.org/10.3389/fncel.2013.00167>
- 803 Meyer, M., Kienzler-Norwood, F., Bauer, S., Rosenow, F., & Norwood, B. A. (2016).  
804 Removing entorhinal cortex input to the dentate gyrus does not impede low  
805 frequency oscillations, an EEG-biomarker of hippocampal epileptogenesis. *Sci Rep*,  
806 *6*, 2–10. <https://doi.org/10.1038/srep25660>
- 807 Mohan, M., Keller, S., Nicolson, A., Biswas, S., Smith, D., Farah, J. O., ... Wiesmann,  
808 U. (2018). The long-term outcomes of epilepsy surgery. *PLoS ONE*, *13*(5), 1–16.  
809 <https://doi.org/10.1371/journal.pone.0196274>
- 810 Muldoon, S. F., Villette, V., Tressard, T., Malvache, A., Reichinnek, S., Bartolomei, F., &  
811 Cossart, R. (2015). GABAergic inhibition shapes interictal dynamics in awake  
812 epileptic mice. *Brain*, *138*(10), 2875–2890. <https://doi.org/10.1093/brain/awv227>
- 813 Osawa, S., Iwasaki, M., Hosaka, R., Matsuzaka, Y., & Tomita, H. (2013). Optogenetically  
814 induced seizure and the longitudinal hippocampal network dynamics. *PLoS ONE*,  
815 *8*(4), 1–14. <https://doi.org/10.1371/journal.pone.0060928>
- 816 Pallud, J., Häussler, U., Hamelin, S., Devaux, B., Deransart, C., & Depaulis, A. (2011).  
817 Dentate gyrus and hilus transection blocks seizure propagation and granule cell

- 818 dispersion in a mouse model for mesial temporal lobe epilepsy. *Hippocampus*,  
819 21(3), 334–343. <https://doi.org/10.1002/hipo.20795>
- 820 Racine, R. J. (1972). Modification of seizure activity by electrical stimulation. II. Motor  
821 seizure. *Electroencephalogr Clin Neurophysiol.*, 32(3), 281–94.
- 822 Rashid, S., Pho, G., Czigler, M., Werz, M. A., & Durand, D. M. (2012). Low frequency  
823 stimulation of hippocampal commissures reduces seizures in chronic rat model of  
824 temporal lobe epilepsy. *Epilepsia*, 53(1), 147–156. <https://doi.org/10.1111/j.1528-1167.2011.03348.x>.Low
- 826 Riban, V., Bouilleret, V., Pham-Le, B. T., Fritschy, J. M., Marescaux, C., & Depaulis, A.  
827 (2002). Evolution of hippocampal epileptic activity during the development of  
828 hippocampal sclerosis in a mouse model of temporal lobe epilepsy. *Neuroscience*,  
829 112(1), 101–111. [https://doi.org/10.1016/S0306-4522\(02\)00064-7](https://doi.org/10.1016/S0306-4522(02)00064-7)
- 830 Ryvlin, P., & Kahane, P. (2005). The hidden causes of surgery-resistant temporal lobe  
831 epilepsy: extratemporal or temporal plus? *Curr Opin Neurol*, 18(2), 125–127.  
832 <https://doi.org/10.1097/01.wco.0000162852.22026.6f>
- 833 Schindelin, J., Arganda-Carreras, I., Frise, E., Kaynig, V., Pietzsch, T., Preibisch, S., ...  
834 Cardona, A. (2012). Fiji - an open source platform for biological image analysis. *Nat*  
835 *Methods*, 9(7), 676–682. <https://doi.org/10.1038/nmeth.2019>.Fiji
- 836 Shiri, Z., Lévesque, M., Etter, G., Manseau, F., Williams, S., & Avoli, M. (2017).  
837 Optogenetic low-frequency stimulation of specific neuronal populations abates  
838 ictogenesis. *Neurobiol Dis*, 37(11), 2999–3008.  
839 <https://doi.org/10.1523/JNEUROSCI.2244-16.2017>
- 840 Thom, M. (2014). Review: Hippocampal sclerosis in epilepsy: A neuropathology review.  
841 *Neuropathol Appl Neurobiol*, 40(5), 520–543. <https://doi.org/10.1111/nan.12150>

- 842 Tulke, S., Haas, C. A., & Häussler, U. (2019). Expression of brain-derived neurotrophic  
843 factor and structural plasticity in the dentate gyrus and CA2 region correlate with  
844 epileptiform activity. *Epilepsia*, *60*(6), 1234–1247. <https://doi.org/10.1111/epi.15540>
- 845 Velasco, A. L., Velasco, F., Velasco, M., Trejo, D., Castro, G., & Carrillo-Ruiz, J. D.  
846 (2007). Electrical stimulation of the hippocampal epileptic foci for seizure control: A  
847 double-blind, long-term follow-up study. *Epilepsia*, *48*(10), 1895–1903.  
848 <https://doi.org/10.1111/j.1528-1167.2007.01181.x>
- 849 Xu, Z., Wang, Y., Chen, B., Xu, C., Wu, X., Wang, Y., ... Chen, Z. (2016). Entorhinal  
850 principal neurons mediate brain-stimulation treatments for epilepsy. *EBioMedicine*,  
851 *14*, 148–160. <https://doi.org/10.1016/j.ebiom.2016.11.027>
- 852 Young, C. C., Stegen, M., Bernard, R., Müller, M., Bischofberger, J., Veh, R. W., ...  
853 Wolfart, J. (2009). Upregulation of inward rectifier K<sup>+</sup> (Kir2) channels in dentate  
854 gyrus granule cells in temporal lobe epilepsy. *J Physiol*, *587*(17), 4213–4233.  
855 <https://doi.org/10.1113/jphysiol.2009.170746>
- 856 Zeineh, M. M., Palomero-Gallagher, N., Axer, M., Gräßel, D., Goubran, M., Wree, A., ...  
857 Zilles, K. (2017). Direct visualization and mapping of the spatial course of fiber  
858 tracts at microscopic resolution in the human hippocampus. *Cereb Cortex*, *27*(3),  
859 1779–1794. <https://doi.org/10.1093/cercor/bhw010>
- 860 Zhao, M., Alleva, R., Ma, H., Daniel, A. G. S., & Schwartz, T. H. (2015). Optogenetic  
861 tools for modulating and probing the epileptic network. *Epilepsy Res.*, *116*, 15–26.  
862 <https://doi.org/10.1016/j.eplepsyres.2015.06.010>
- 863
- 864

865 **Figures**

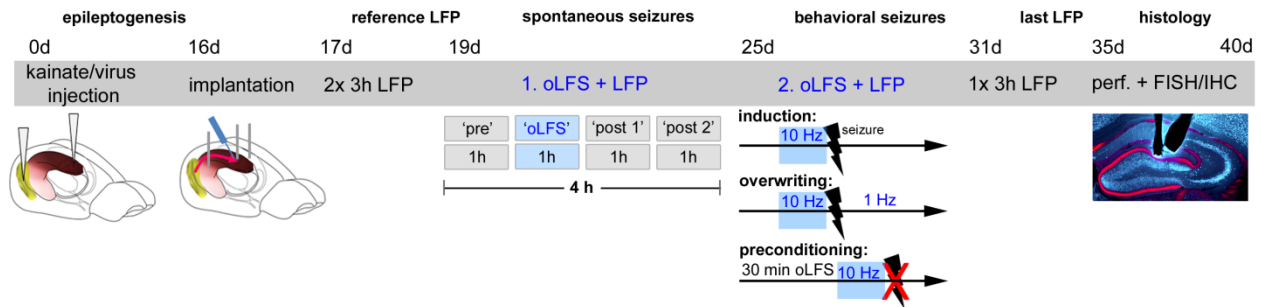

866  
 867 **Figure 1 Experimental design for *in vivo* oLFS.** Animals received intrahippocampal KA and a ChR2-  
 868 carrying virus into the entorhinal cortex to trigger epileptogenesis and the expression of ChR2 in entorhinal  
 869 afferent fibers. At 16 days post injections, electrodes and an optic fiber were implanted. Following recovery  
 870 from implantations, reference LFPs were recorded on two successive days for three hours each. Next, the  
 871 effect of oLFS on spontaneously occurring seizures was tested. To this end, recording sessions of four  
 872 hours per day were performed in all animals. In the first hour ('pre'), LFPs were recorded to determine  
 873 spontaneous epileptic activity followed by the application of oLFS pulses for one hour ('oLFS'). The effect  
 874 of the optogenetic stimulation was determined by further two hours of recording ('post 1 and 2'). Three  
 875 different oLFS frequencies (1, 0.5 or 0.2 Hz) were applied on successive days in each animal (two  
 876 sessions per animal). In the next block, generalized seizures were induced by optogenetic (10 Hz)  
 877 stimulation and oLFS (1 and 0.5 Hz) was applied to test potential seizure suppressive effects (overwriting).  
 878 In addition, a seizure preventing action was tested by applying oLFS prior to the pro-convulsive (10 Hz)  
 879 stimulation (preconditioning). Finally, animals were perfused after the last LFP recording session and brain  
 880 sections were processed for immunohistological procedures. FISH, fluorescent *in situ* hybridization; IHC,  
 881 immunohistochemistry; perf., perfusion

882  
883  
884  
885  
886  
887  
888  
889  
890  
891  
892  
893  
894  
895  
896  
897  
898  
899  
900  
901  
902  
903  
904  
905  
906  
907  
908

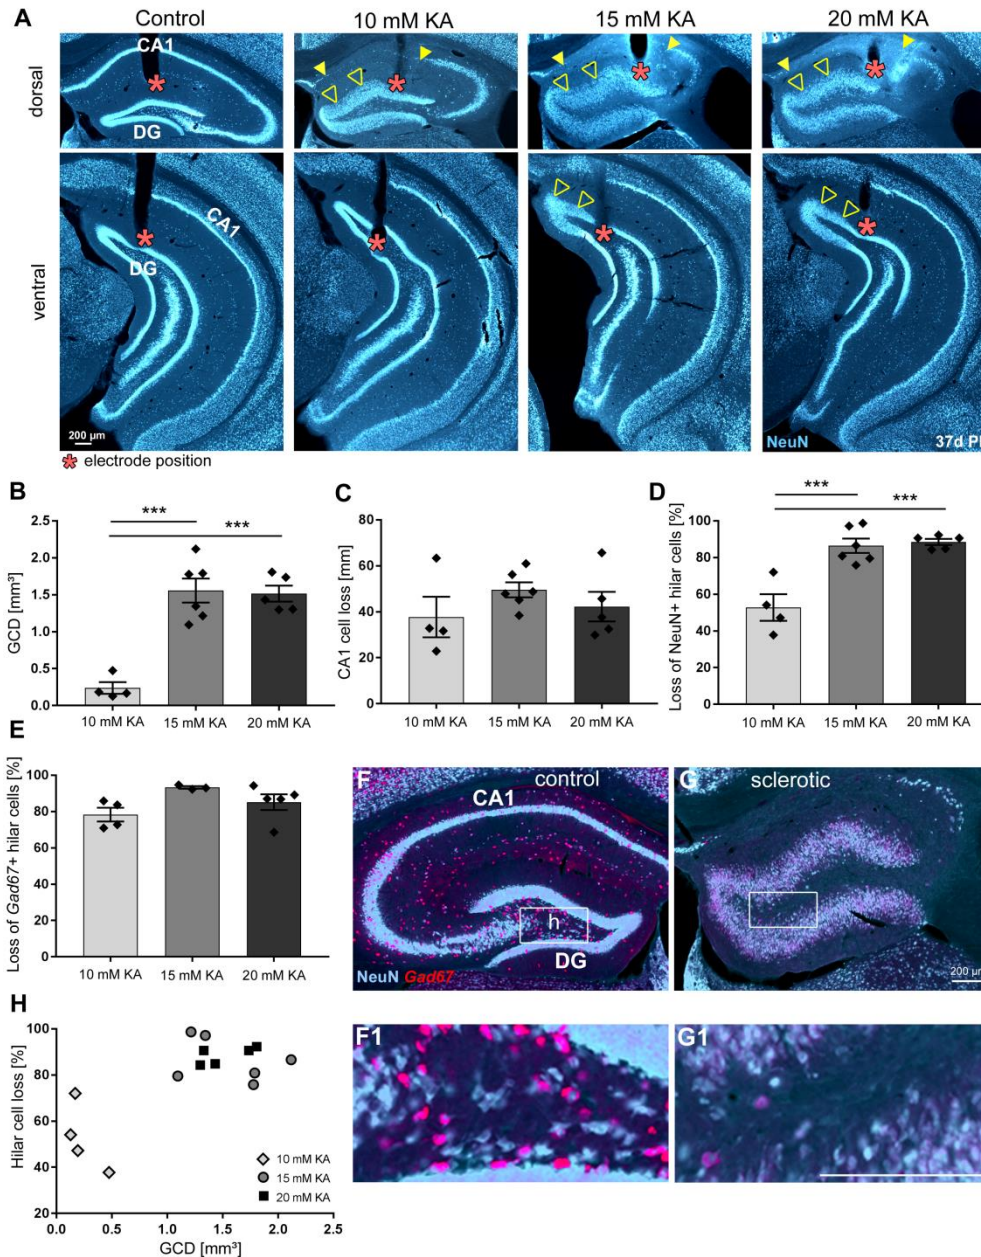

909 **Figure 2 Dependence of hippocampal sclerosis on KA concentration.** (A) Representative NeuN-  
910 labeled sections of dorsal and ventral hippocampal regions treated with different KA concentrations at 37  
911 days post injection (PI). In each section, the electrode position is marked with a red asterisk. Epileptic  
912 hippocampi show GCD in the dentate gyrus (open arrowheads) and cell loss in CA1 (region between filled  
913 arrowheads). Analysis of hippocampal sclerosis by quantification of (B) GCL volume of dispersed regions  
914 (i.e., GCD), (C) total length of cell loss in CA1, (D) % loss of NeuN<sup>+</sup> hilar cells and (E) loss of Gad67<sup>+</sup> hilar  
915 interneurons in the sclerotic vs non-sclerotic hippocampus (i.e. (G, G1) ipsilateral vs (F, F1) contralateral).  
916 One-way ANOVA; Tukey's multiple comparison test; \* $p < 0.05$ , \*\* $p < 0.01$  and \*\*\* $p < 0.001$ . All values are  
917 given as mean  $\pm$  SEM. (H) Animals with stronger hilar cell loss (15 and 20 mM KA) show a higher degree  
918 of GCD. Scale bars 200  $\mu$ m.

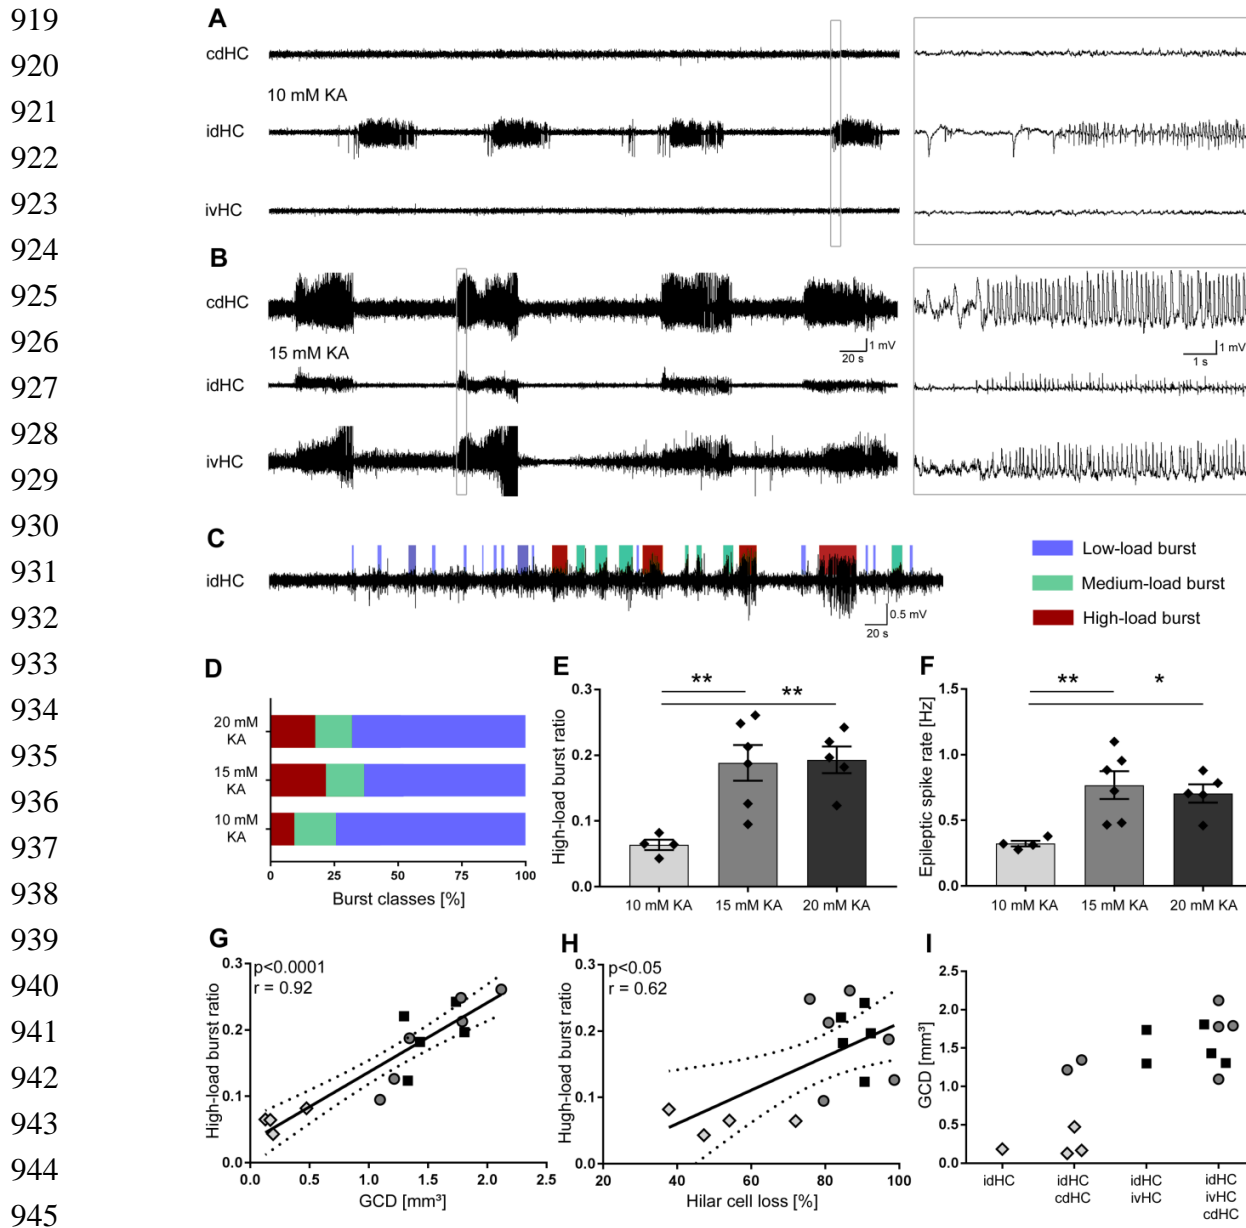

946 **Figure 3 Severity and spatial occurrence of epileptiform activity elicited by different KA**  
947 **concentrations. (A, B)** Representative LFP traces for low (10 mM) and high (15 mM) KA concentrations  
948 (20 mM not shown) at the three different recording sites: cdHC, idHC and ivHC. Animals with a high KA  
949 concentration show a more widespread epileptiform activity pattern. **(C – F)** Automatic quantification of  
950 epileptiform activity. High KA concentrations elicit a higher percentage of high-load burst and increased  
951 epileptic spike rate. One-way ANOVA; Tukey's multiple comparison test; \* $p < 0.05$ , \*\* $p < 0.01$ . All values are  
952 given as mean  $\pm$  SEM. **(G, H)** The burst ratio is positively correlated with GCD and hilar NeuN<sup>+</sup> cell loss  
953 (**(G)**:  $p < 0.001$ , two-tailed; Pearson's  $r = 0.92$ ; **(H)**:  $p < 0.05$ , two-tailed; Pearson's  $r = 0.62$ ). **(I)** Pattern of  
954 epileptiform activity (visible bursts at recording sites) according to KA concentration and GCD. The  
955 epileptiform activity pattern appears spatially more restricted to the dorsal regions of the hippocampus for  
956 the low KA concentration (10 mM, shown in **A**) accompanied by a smaller extent of GCD.

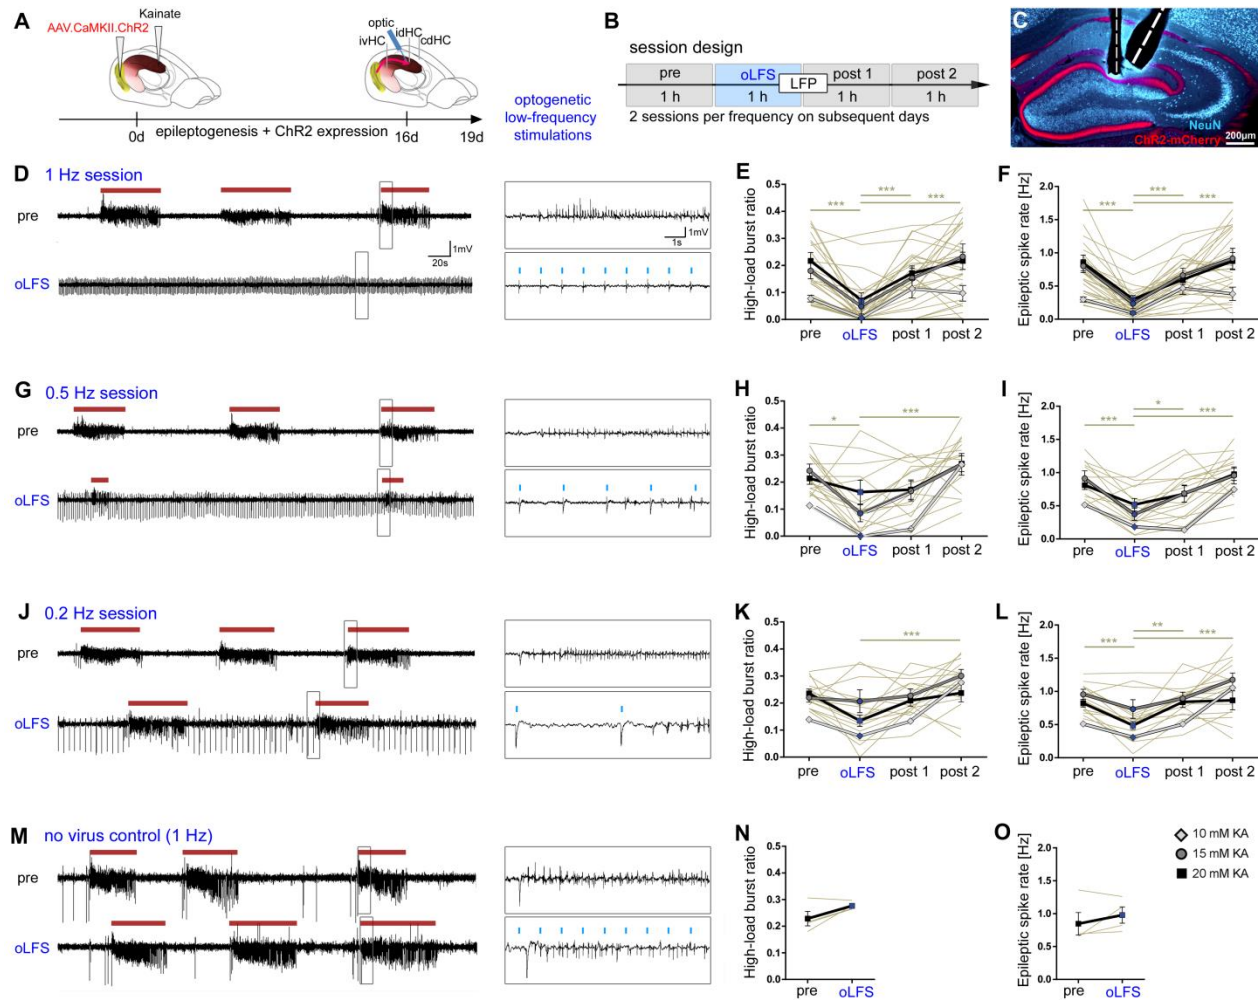

957 **Figure 4 Optogenetic low-frequency stimulation of entorhinal afferents interferes with ictogenesis.**  
 958 **(A – C)** Experimental design. We targeted ChR2 expression **(C, red)** to excitatory neurons in the medial  
 959 entorhinal cortex using viral vectors and **(B, C)** locally stimulated entorhinal afferents in the sclerotic idHC  
 960 for one hour per day, twice at each frequency applying only one frequency per session (1, 0.5 or 0.2 Hz).  
 961 **(D, G, J, M)** Representative LFP traces (15 mM KA, idHC electrode) for the ‘pre’ and ‘oLFS’ sub-sessions  
 962 (1, 0.5, 0.2 Hz and no virus control, 1 Hz) and are shown. **(D)** Optogenetic stimulation with pulsed light at  
 963 1 Hz effectively decreases spontaneous epileptiform activity (marked with a red bar). **(E, F)** Automatic  
 964 quantification of epileptiform activity shows that oLFS reduces the burst ratio as well as the epileptic spike  
 965 rate in all animals independently of the KA concentration (10 mM: light grey; 15 mM: dark grey; 20 mM:  
 966 black) followed by a return to pre-stimulation levels within two hours (‘post 1’ and ‘post 2’). **(G, J)** oLFS with  
 967 0.5 Hz or 0.2 Hz has a weaker antiepileptic effect as quantified with the automatic detection algorithm **(H, I**  
 968 **and K, L)**. Single sessions (beige) were used to calculate the RM one-way ANOVA; Tukey’s multiple  
 969 comparison test (all KA concentrations merged); \* $p < 0.05$ , \*\* $p < 0.01$  and \*\*\* $p < 0.001$ . **(M – O)** 1 Hz  
 970 stimulation doesn’t have an effect in no-virus controls (20 mM KA). All values are given as mean  $\pm$  SEM.



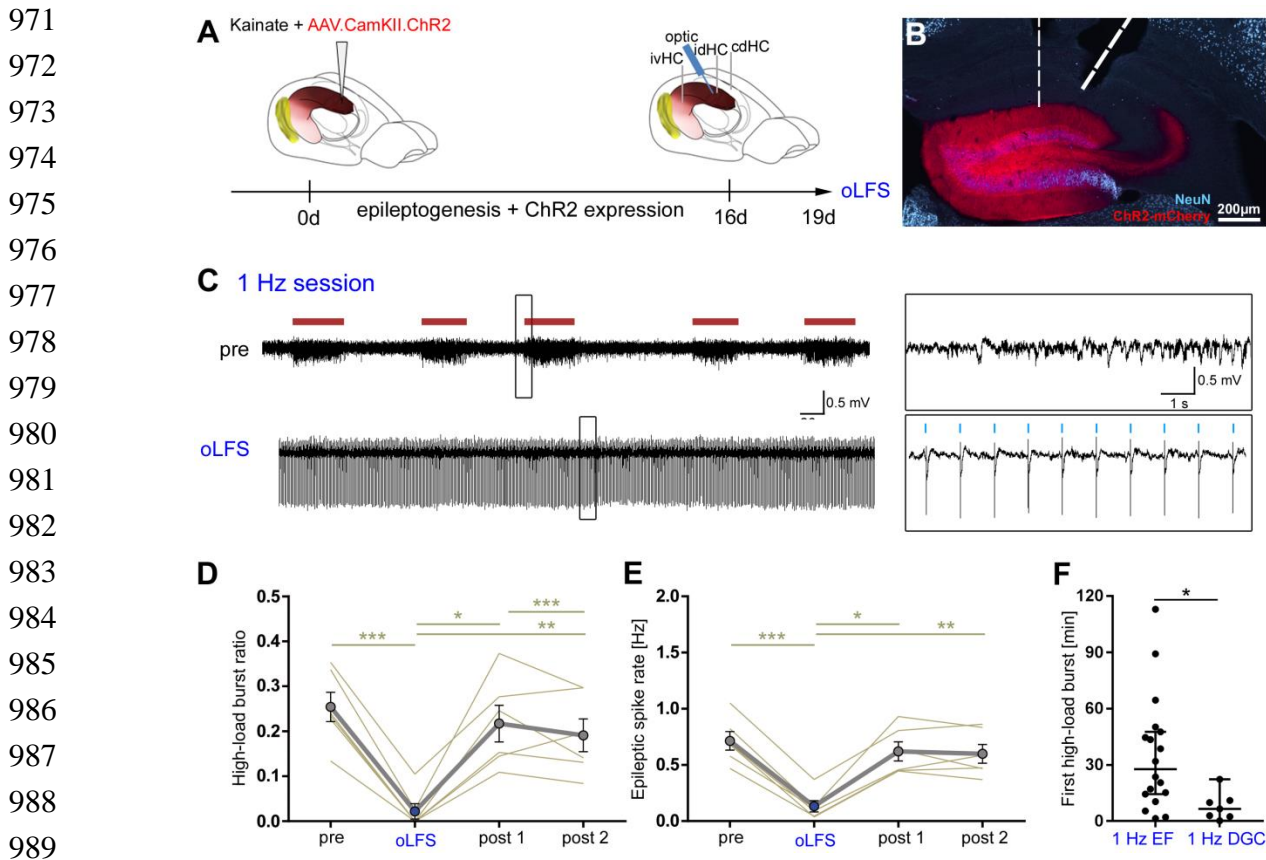

990 **Figure 5 Direct oLFS of DGCs results in suppression of epileptiform activity with a shorter seizure-**  
991 **free period after stimulation. (A, B)** Experimental design. To infer if anti-ictogenic stimulation effects  
992 were due to activation of DGCs or specific to stimulation of entorhinal afferents, we performed direct  
993 photostimulation of ChR2-expressing DGCs in idHC (**B**, red). Animals were injected with KA (15 mM) and  
994 virus in the dentate gyrus. (**C**) An exemplary LFP trace from the idHC site. (**D, E**) 1 Hz stimulation of  
995 DGCs significantly reduces the high-load burst ratio and epileptic spike rate. Epileptiform activity reoccurs  
996 within the first hour after stimulation ('post 1') and remains in the second hour ('post 2'). RM one-way  
997 ANOVA; Tukey's multiple comparison test; \* $p < 0.05$ , \*\* $p < 0.01$  and \*\*\* $p < 0.001$ . Values are given as mean  $\pm$   
998 SEM. (**F**) Compared to entorhinal fiber (EF) stimulation, seizure-activity returned directly after stimulation  
999 cessation. Unpaired t-test; \* $p < 0.05$ .

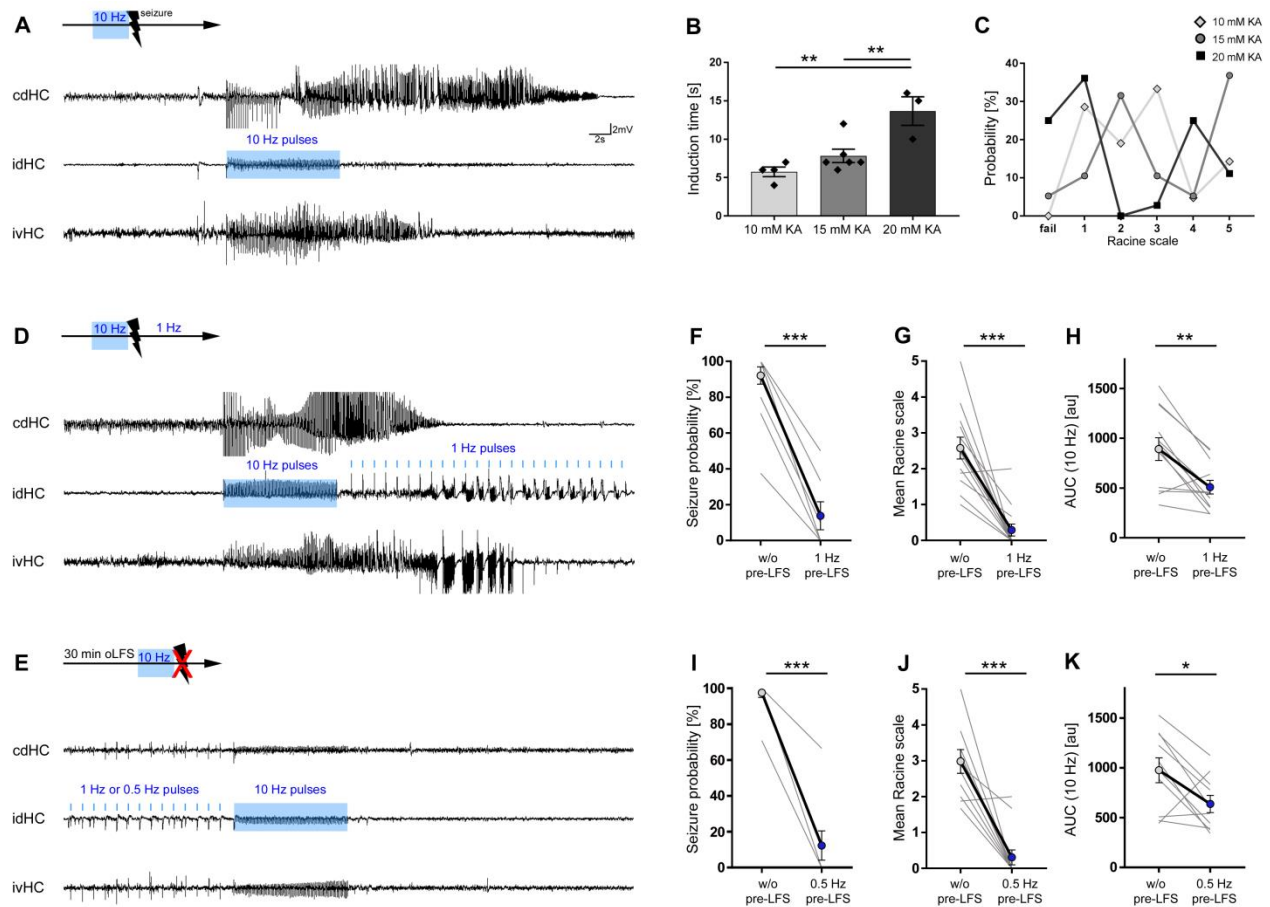

1000 **Figure 6 Preceding oLFS prevents seizure generalization.** (A, D, E) Representative LFP traces at the  
 1001 three recording sites (cdHC, idHC and ivHC). Schematic of the respective stimulation procedure is shown  
 1002 above each cdHC trace. (A, B) Local 10 Hz photostimulation of entorhinal afferents reliably induces  
 1003 generalized seizures in all KA groups. The induction time for generalized seizures depends on the KA  
 1004 concentration. One-way ANOVA; Tukey's multiple comparison test; \*\*p<0.01. (C) Mice exhibit behavioral  
 1005 symptoms equivalent to RS stage 1 to 5, independently of the KA concentration. (D) Seizure  
 1006 generalization cannot be prevented by oLFS (1 Hz) applied directly after seizure induction. (E) oLFS for 30  
 1007 min prior to the pro-convulsive stimulus effectively prevents seizure generalization. (F, I) Both, 1 and 0.5  
 1008 Hz oLFS significantly decrease the seizure probability in all animals. Wilcoxon rank test, matched-pairs;  
 1009 \*\*\*p<0.001 (n=14 animals). (G, J) Trials in which seizure generalization has not been prevented  
 1010 completely, the ensuing seizure is associated with a milder behavioral phenotype (RS stage). Paired t-test;  
 1011 \*\*\*p<0.001. (H, K) Cellular response to 10 Hz stimulation quantified as mean AUC. The response is  
 1012 reduced after 1 or 0.5 Hz oLFS stimulation in sessions in which seizures have been successfully  
 1013 suppressed. Paired t-test; \*\*p<0.01 and \*p<0.05 (n=13 and 10 animals), respectively. All values are given  
 1014 as mean ± SEM.

1015

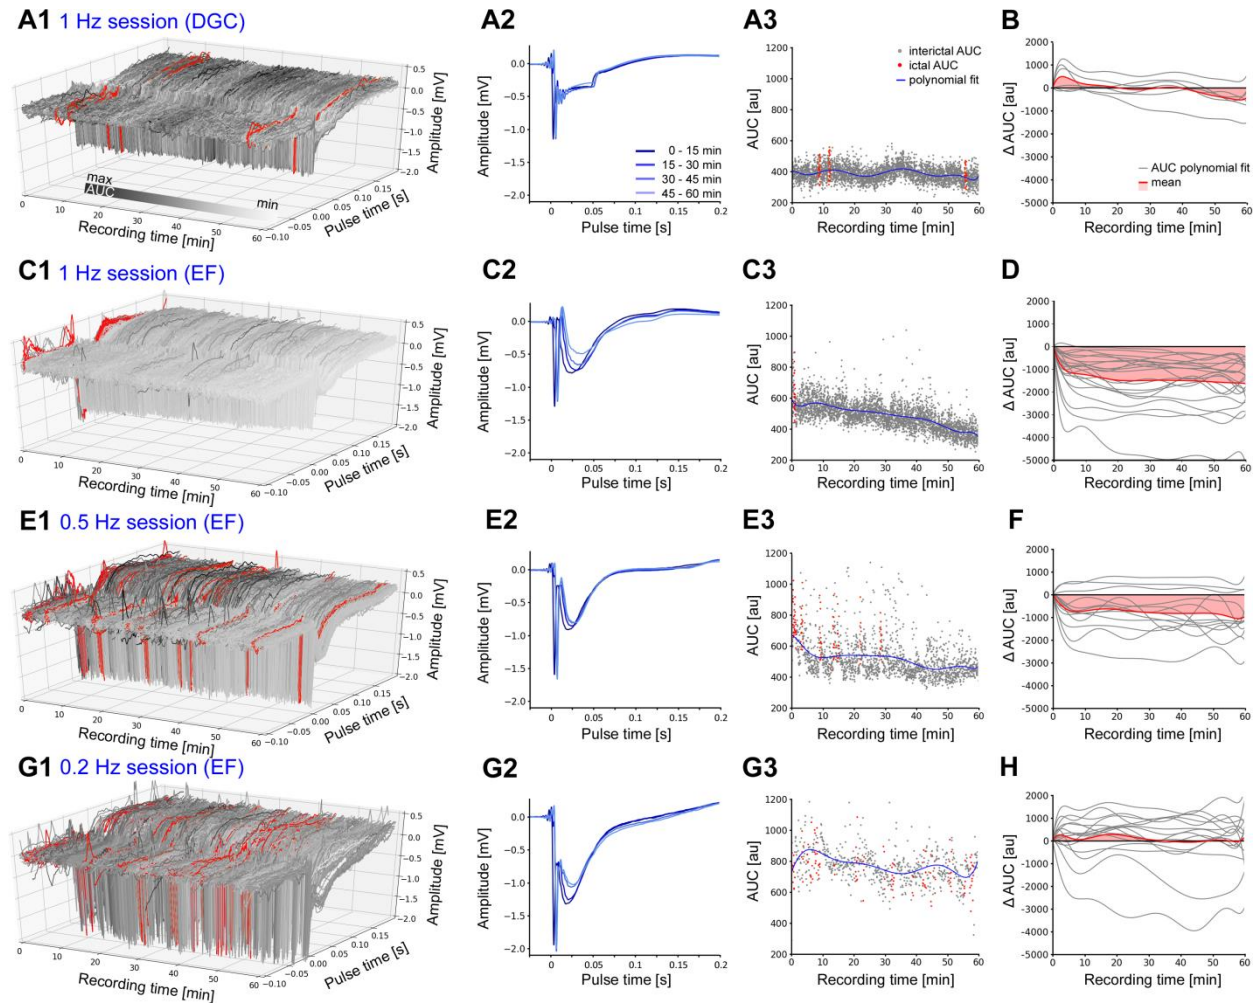

1016 **Figure 7 Evoked cellular responses decrease over time during continuous oLFS.** (A1)  
 1017 Representative examples of evoked responses in DGCs following direct or (C1, E1, G1) indirect  
 1018 photostimulation via entorhinal fiber (EF) stimulation at different frequencies. (A2, C2, E2, G2) Mean  
 1019 evoked response for 15 min time windows are shown. (A3, C3, E3, G3) For each evoked response,  
 1020 magnitudes are measured using the AUC during a peri-stimulus time interval [-0.1, +0.2 s] upon each light  
 1021 pulse. Responses during ictal periods (high-load events) are marked in red. A polynomial fit of single  
 1022 interictal AUC values is shown (blue line). (A1) Direct photostimulation of DGCs (1 Hz) evokes constant  
 1023 responses typical for ChR2 activation. (A2) Evoked cellular responses and (A3) single AUC values are  
 1024 stable over time. (B, D, F, H) Normalized polynomial fits (delta AUC) for all stimulation sessions (grey)  
 1025 and mean changes (red). (B) Evoked responses stay stable over one hour direct photostimulation. (C1-3)  
 1026 Entorhinal fiber stimulation (1 Hz) causes a decline of the cellular response over time. (D) Mean evoked  
 1027 responses (AUCs) decrease strongly within the first 10 min of photostimulation. (E – H) Entorhinal fiber  
 1028 stimulation at 0.5 and 0.2 Hz has a weaker effect on the change of the evoked response magnitude.  
 1029

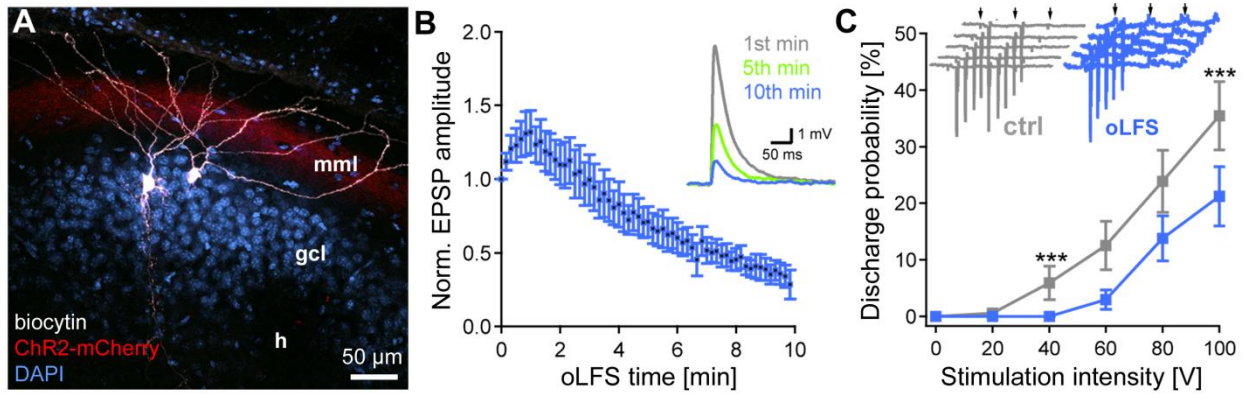

1030  
1031 **Figure 8 Decrease of single-cell EPSPs and discharge probability after 10 min oLFS. (A)**  
1032 Representative confocal projection of a dentate gyrus slice from a KA- (15 mM) and AAV-treated mouse  
1033 28 days after SE. Two biocytin-filled DG cells (white) have been recorded in this section. ChR2-expressing  
1034 entorhinal fibers are visible in the middle molecular layer (red, mml). Cell bodies are stained with DAPI  
1035 (blue). h, hilus; scale bar 50  $\mu\text{m}$ . **(B)** Blue light pulses induce robust EPSPs which decline strongly during  
1036 a 10 min stimulation protocol (50 ms pulses at 1 Hz). **(C)** Extracellular electrical stimulation (5 pulses, 50  
1037 Hz, arrows) of entorhinal fibers induces action potentials measured by loose-patch recordings of DG cells  
1038 (inset, gray traces). Photostimulation at 1 Hz over 10 min (inset, blue traces) significantly reduces the  
1039 discharge probability of DG cells. ANOVA on ranks with Dunn's post-hoc correction; \*\*\* $p < 0.001$ . Values are  
1040 given as mean  $\pm$  SEM.  
1041

## 1042 **Supplementary Materials and Methods**

### 1043 **Fluorescent in situ hybridization**

1044 Brain slices were pre-treated in a 1:1 mixture of hybridization buffer [50% formamide,  
1045 4xSSC, 5% dextran sulfate, 250 µg/ml heat-denatured salmon sperm DNA, 200 µl yeast  
1046 t-RNA, 1% Denhardt's-reagent (Sigma-Aldrich, Steinheim, GER)] and 2xSSC at RT for  
1047 15 minutes. Subsequently, the slices were pre-hybridized in hybridization buffer for 60  
1048 min at 45°C, followed by addition of DIG-labeled antisense or sense *Gad67* cRNA probe  
1049 (100 ng/ml) and incubated overnight at 45°C. Slices were washed in 2xSSC for 2 x 15  
1050 min at RT and then successively rinsed at 55°C for 15 min in 2x SSC with 50%  
1051 formamide; 0.1x SSC with 50% formamide and twice in 0.1x SSC alone. Then the slices  
1052 were rinsed in 0.1 M Tris-buffered saline (TBS) for 2x 10 min and transferred to the  
1053 blocking buffer [1% blocking reagent (Roche Diagnostics, Mannheim, GER) in TBS] for  
1054 60 min at RT. Slices were pre-hybridized at 45°C, followed by addition of DIG-labeled  
1055 antisense or sense *Gad67* cRNA probe (100 ng/ml) and incubated overnight at 45°C.  
1056 For fluorescent detection, tissue sections were treated with a horseradish peroxidase-  
1057 conjugated DIG antibody (1:2000, raised in sheep; Roche Diagnostics) overnight at 4°C  
1058 and developed in the presence of amplification buffer and tyramide working solution  
1059 (1:50) for 6 min in the dark, using the Tyramide Signal Amplification (TSA) Plus Cyanine  
1060 3 System kit (PerkinElmer, Waltham, USA)). The staining-reaction was stopped by  
1061 rinsing in TBS for 3x 5 min and 1x 15 min. Slices were kept in the dark for further  
1062 immunofluorescence staining.

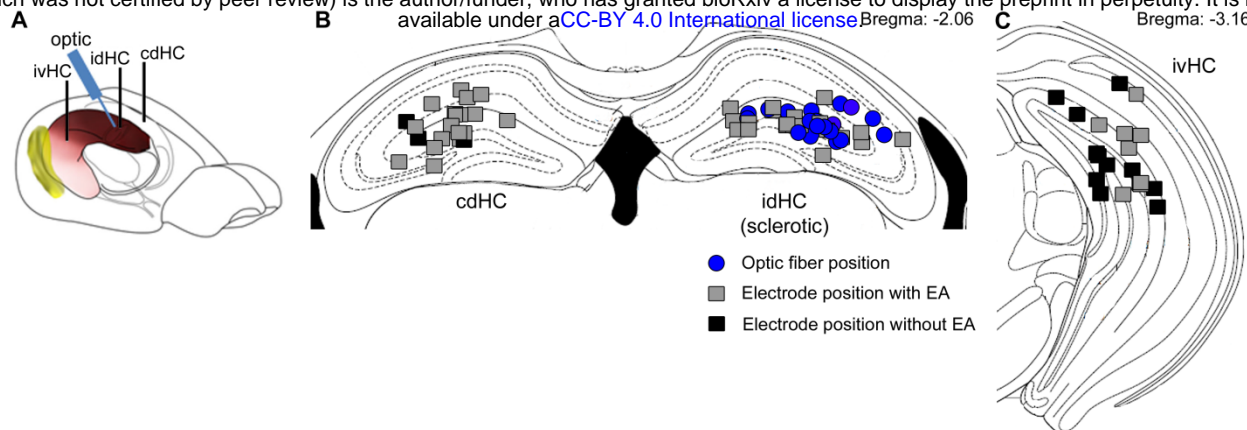

**Supplementary Figure 1 Positions of implanted electrodes and optic fibers for all animals included in the study. (A)** Implantation scheme. Electrode positions for all animals (n=21) were histologically validated and were located at three different recording sites: cdHC, contralateral dorsal hippocampus; idHC, ipsilateral dorsal hippocampus and ivHC, ipsilateral ventral hippocampus. The optic fiber was placed in a 30° angle at the idHC site. **(B)** Positions of the optic fiber (blue circle) and electrodes in the dorsal region, color-coded for the detection of epileptiform activity (EA, grey square) or no EA (black square) on the respective electrode. **(C)** Ipsilateral ventral electrode positions.

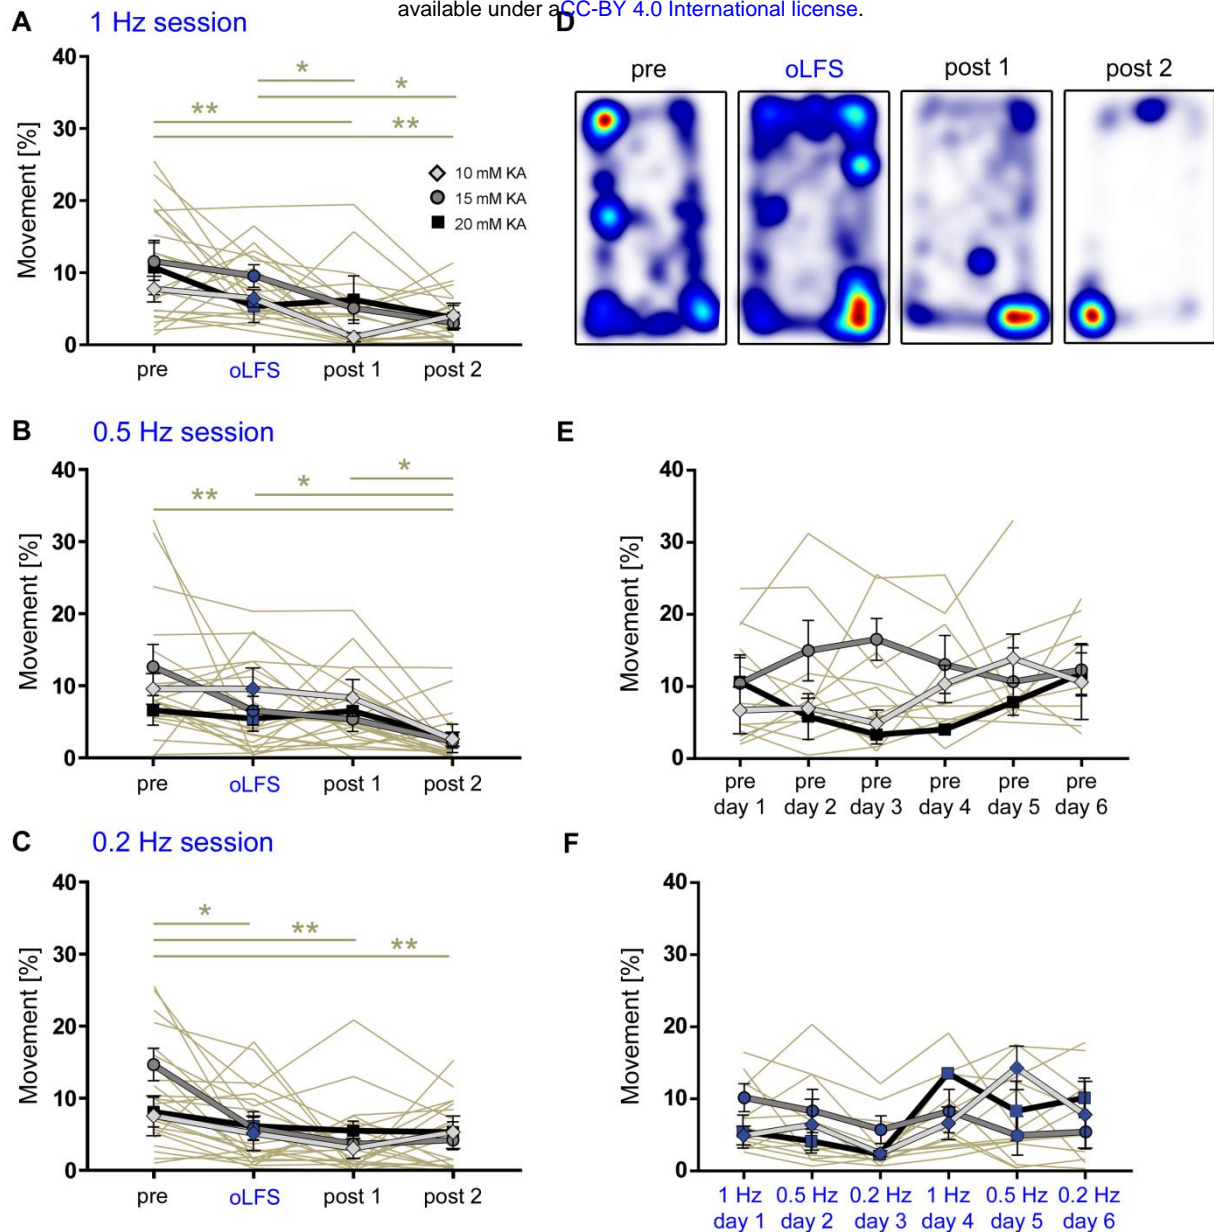

**Supplementary Figure 2 Movement analysis of chronically epileptic mice during LFP recordings.** Freely-moving animals were video tracked, running phases were automatically detected and quantified as time spent running (>4 cm/s). **(A – C)** Analysis of all sub-session clearly reveals that all mice, independent of the KA concentration, exhibit normal running behavior that declines gradually during the recording time of four hours. **(D)** Representative heat map of a 1 Hz session with the corresponding ‘pre’ and ‘post’ recordings. Warm colors indicate places of longer stays during each sub-session. **(E, F)** Mice don’t change their running behavior during oLFS experiments (six days in a row) in the ‘pre’ or the ‘oLFS’ sessions. Hence there is no adaptation to the environment across days and no difference between stimulation frequencies. Individual values are presented in Supplementary Table S3. Single sessions (beige) are used to calculate the RM one-way ANOVA; Tukey’s multiple comparison test (all KA concentrations merged); \* $p < 0.05$  and \*\* $p < 0.01$ . Values are given as mean  $\pm$  SEM.

**A1** 1 Hz session

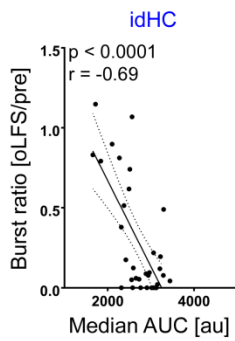

**A2**

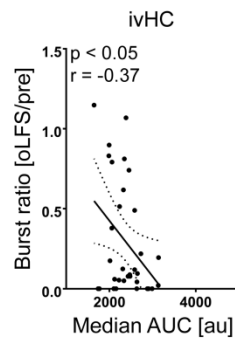

**A3**

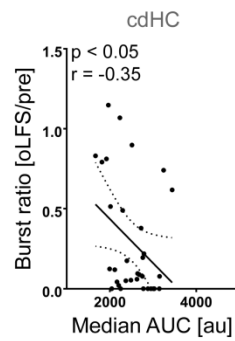

**B1** 0.5 Hz session

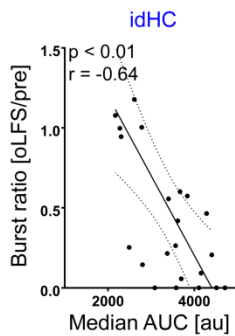

**B2**

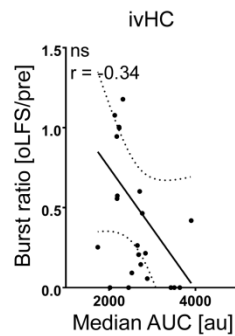

**B3**

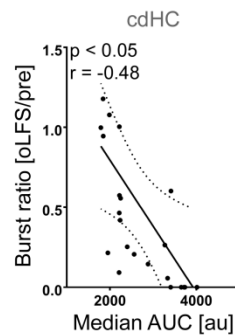

**C1** 0.2 Hz session

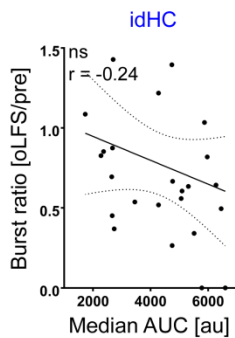

**C2**

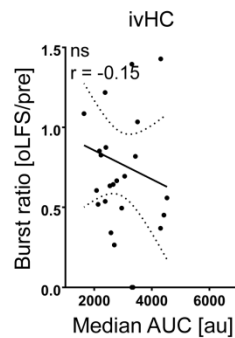

**C3**

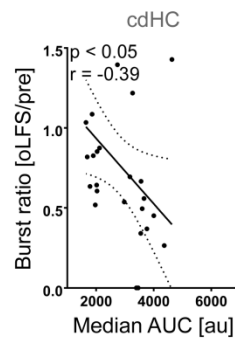

**D**

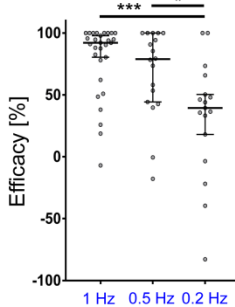

**Stimulation efficacy of oLFS depends on the magnitude of evoked responses.**

Linear regression analysis of the stimulation efficacy (oLFS/pre burst ratio) and the median AUC of the respective session at all electrode positions. **(A1-3)** 1 Hz sessions. **(B1-3)** 0.5 Hz sessions. **(C1-3)** 0.2 Hz sessions. **(D)** For comparison of the stimulation efficacy between frequencies, we consider only sessions with a cellular response (at idHC) within the range of the standard deviation. 1 Hz oLFS is the most effective stimulation paradigm, but 0.5 and 0.2 Hz also elicit remarkable anti-ictogenic effects. One-way ANOVA; Dunn's multiple comparison test; \* $p < 0.05$ , \*\*\* $p < 0.001$ . Values are given as median  $\pm$  95% CI.



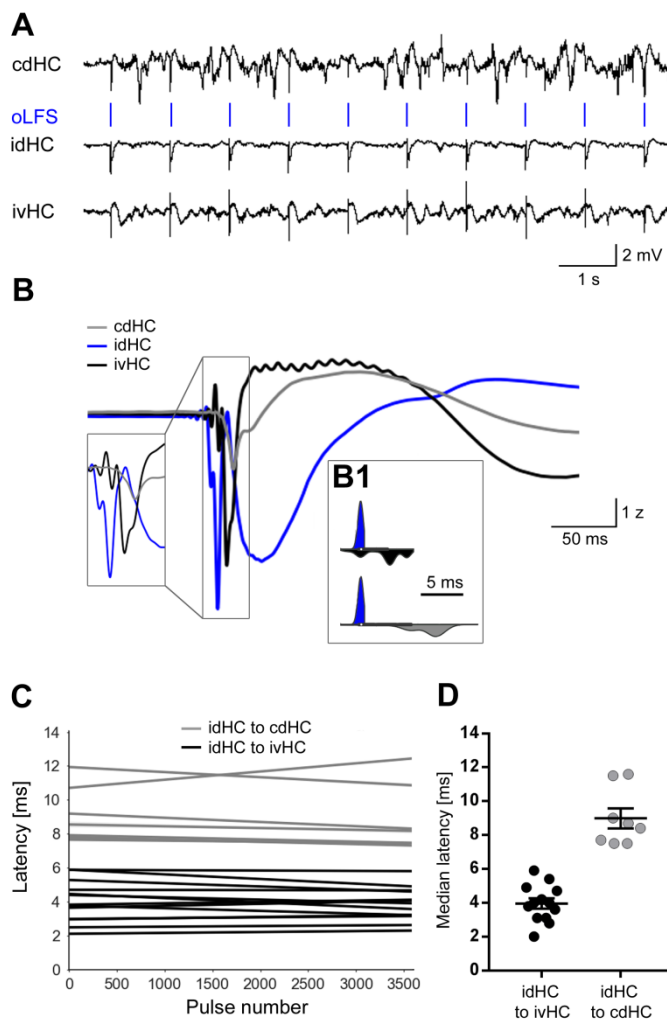

### Supplementary Figure 4 Local oLFS leads to delayed responses in other regions of both hippocampi. (A)

Representative LFP traces of all three electrodes during 1 Hz oLFS. Local stimulation of DGCs via entorhinal afferents in the idHC evokes population spikes also in the ivHC and cdHC. (B) Population spikes occur first in the idHC (blue), followed by ivHC (black) and cdHC (grey) (representative example). (B1) Distribution of spike times for 3600 responses (one hour, 1 Hz stimulation) at the three electrode positions. (C) Robust linear regression shows stable latencies from idHC to ivHC (black, n=12 sessions from 8 animals) and cdHC regions (grey, n=8 sessions from 7 animals) over one hour oLFS. (D) Population spikes occur with a median latency of 4 ms and 8.5 ms in the ivHC and cdHC region, respectively.

**A** Evoked generalized seizure

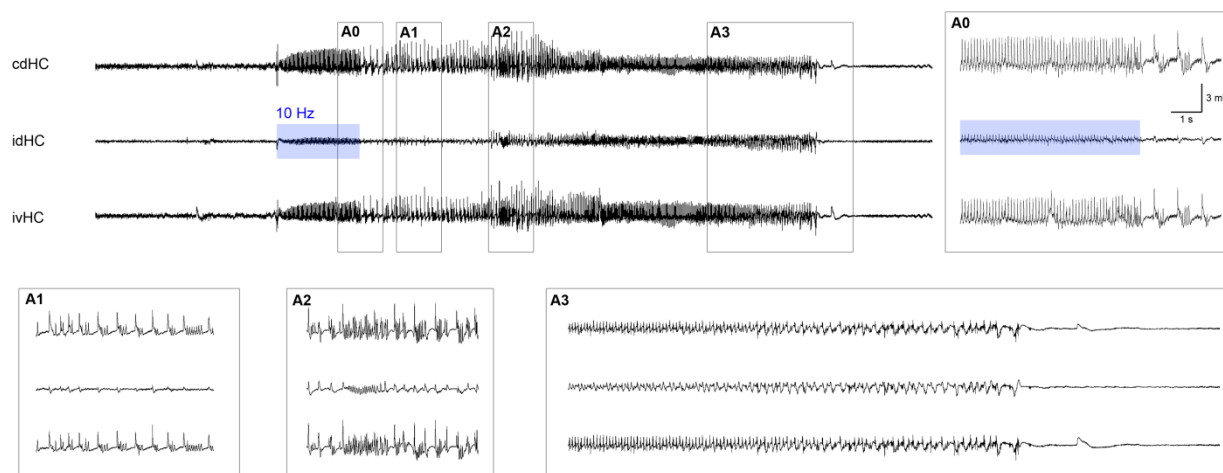

**B** Spontaneous generalized seizure

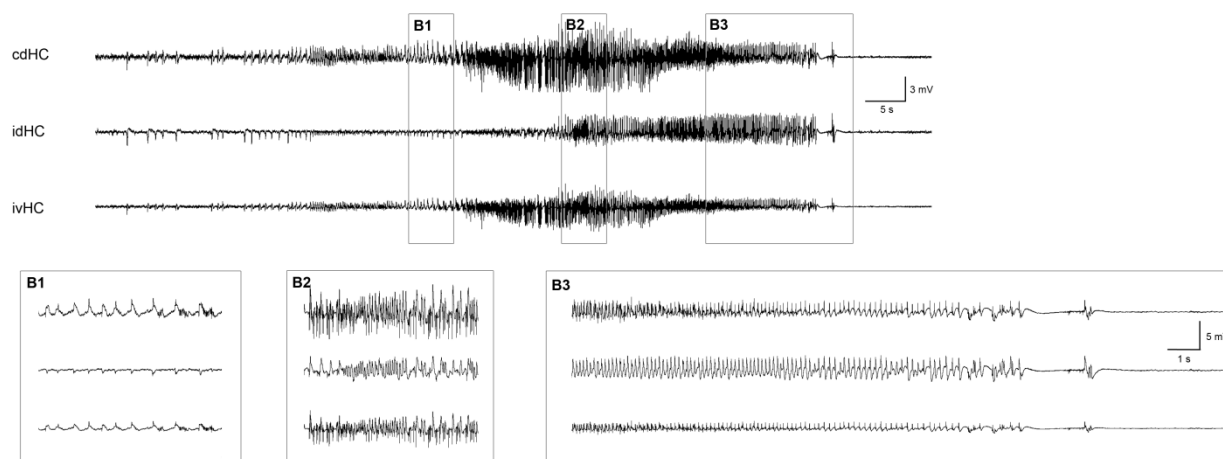

**Supplementary Figure 5 Comparison of spontaneous and evoked generalized seizures. (A, B)** Representative LFP traces of an optogenetically evoked and a spontaneous generalized seizure from the same animal. **(A0)** High-amplitude epileptic spikes emerge in addition to the evoked potentials during stimulation and rhythmic activity persists after 10 Hz stimulation has been stopped. Both seizures consist of the same building blocks ( **(A1, B1)** spike-and-wave events; **(A2, B2)** fast discharges; **(A3, B3)** increasing inter-spike-intervals and subsequent termination) with similar dynamics. This consistency is evident for all mice (n=5) in which both spontaneous and evoked generalized seizures could be detected.
